# Supplementary material for: Self-control mediates the relationship between time perspective and mobile phone addiction in Chinese college students
Source: PeerJ. 2023 Nov 20;11:e16467. doi: 10.7717/peerj.16467 (PMC10666608; doi:10.7717/peerj.16467)
Supplement: Raw Data [file peerj-11-16467-s001.xlsx]

## Sheet: raw data 
number	a1	a2	a3	a4	a5	a6	a7	a8	a9	a10	a11	a12	a13	a14	a15	a16	a17	a18	a19	a20	b1	b2	b3	b4	b5	b6	b7	b8	b8	b10	b11	b12	b13	b14	b15	b16	c1	c2	c3	c4	c5	c6	c7	c8	c9	c10	c11	c12	c13
2	5	5	2	1	3	5	5	5	2	2	2	5	5	5	2	2	5	2	2	5	5	5	5	5	5	5	5	5	1	5	5	5	3	5	5	5	1	5	1	2	1	5	1	1	1	1	1	1	1
3	3	1	4	3	3	5	2	1	1	1	4	3	2	2	1	3	1	4	3	1	5	4	3	5	4	5	4	4	1	4	1	5	1	2	3	3	3	3	3	2	3	5	4	3	2	4	2	2	3
4	4	1	4	4	2	4	3	2	1	3	5	2	2	2	3	3	4	4	3	3	5	4	3	5	2	5	5	2	2	3	5	5	3	4	2	4	3	2	3	3	4	2	4	4	4	3	3	3	2
5	4	5	4	3	3	4	4	1	5	1	4	2	3	2	2	3	1	3	3	3	3	2	3	3	4	3	2	2	1	2	1	3	2	4	4	2	3	3	3	4	4	3	3	2	2	2	3	3	3
6	5	5	5	3	3	2	4	5	5	3	2	4	5	2	2	3	2	2	5	5	5	3	2	4	2	5	3	2	1	2	4	4	2	2	3	4	3	4	4	4	3	2	4	4	2	3	3	3	3
7	4	4	4	4	5	3	4	2	3	3	3	2	2	1	1	4	3	3	3	5	5	3	4	3	4	3	3	1	1	2	5	4	3	2	4	2	4	3	3	3	3	1	3	5	2	3	2	3	2
8	4	4	3	3	4	2	4	3	4	4	2	4	3	4	3	2	4	2	4	4	4	2	2	3	2	3	4	4	2	4	2	4	3	4	3	4	3	4	4	4	4	4	3	4	3	3	1	4	3
10	5	5	4	5	3	3	4	4	4	2	2	4	4	2	2	3	2	4	4	5	5	3	3	4	3	5	2	1	1	4	4	4	2	4	2	5	3	3	2	4	4	2	2	3	2	2	2	4	2
11	5	5	5	2	1	3	5	5	5	3	2	1	4	4	3	1	5	4	2	5	5	5	5	5	5	5	5	5	5	5	5	5	5	5	5	5	1	5	5	5	1	2	4	5	3	5	1	5	5
12	4	4	3	3	2	4	4	4	2	2	4	2	3	2	2	4	3	4	3	4	4	3	2	4	4	3	4	4	4	5	2	3	3	4	4	4	3	5	4	5	3	2	3	2	3	4	1	4	4
13	4	4	4	3	2	2	4	2	4	2	2	3	2	2	2	4	4	2	4	4	4	2	3	2	3	3	4	2	2	4	1	1	1	2	2	3	3	3	3	2	3	3	2	3	3	2	3	2	2
14	3	5	4	4	2	3	3	3	5	5	5	4	3	2	2	4	3	3	4	2	4	4	4	4	3	4	4	2	2	2	4	4	2	4	2	4	3	1	3	2	3	4	2	3	4	2	3	3	3
15	5	2	3	3	4	3	3	4	2	3	3	5	5	5	3	5	5	5	5	3	5	5	5	4	5	5	5	5	5	5	3	3	3	4	3	3	3	3	4	4	4	3	3	3	4	4	3	4	4
16	5	4	4	4	4	3	4	2	4	2	2	4	4	2	2	4	4	2	4	4	5	2	2	4	3	2	3	4	3	3	2	4	2	3	2	3	4	3	4	3	4	3	2	2	4	2	3	3	2
17	2	4	4	5	2	3	3	1	3	2	3	2	2	1	2	4	3	1	5	1	3	1	3	2	3	2	2	2	2	2	2	2	2	2	2	2	3	2	2	2	3	2	3	2	4	3	3	3	2
18	3	4	4	3	2	2	3	3	4	2	3	4	3	4	2	3	4	3	3	4	4	4	4	4	4	3	4	2	2	3	4	3	2	3	4	4	3	3	3	4	4	4	2	2	3	2	2	3	3
19	5	5	4	4	2	2	5	3	5	4	1	1	2	3	3	4	3	2	3	4	5	1	4	3	2	2	2	2	2	3	1	2	1	2	1	1	2	1	2	3	4	3	2	2	4	3	3	3	4
20	4	4	5	2	1	2	4	1	4	4	1	2	2	1	1	4	4	2	4	4	3	2	1	2	4	2	2	2	1	1	1	1	1	1	3	3	4	3	2	1	5	1	1	1	1	1	2	3	3
21	5	5	5	4	2	2	5	2	5	3	2	2	2	2	3	5	5	2	4	4	3	1	2	2	1	1	1	1	2	2	2	3	3	2	1	1	5	3	2	1	5	2	1	3	1	1	4	2	2
22	5	4	4	3	4	4	3	5	4	3	4	2	4	2	2	4	3	4	4	4	5	4	4	4	3	4	4	4	2	4	5	4	2	4	3	4	3	3	5	2	3	2	3	4	4	4	2	2	3
23	5	5	5	5	1	3	5	3	5	2	3	3	2	1	1	4	3	1	5	3	5	2	2	5	3	5	4	5	3	5	5	5	2	3	2	3	4	1	2	1	4	4	3	3	4	2	4	3	2
24	4	4	2	1	4	5	3	5	4	2	5	4	5	2	1	3	4	5	2	2	5	5	4	5	5	5	4	4	1	3	1	5	4	4	5	5	3	5	5	5	2	3	3	5	5	5	1	5	5
25	4	5	3	2	5	5	5	5	5	5	5	3	4	5	5	5	3	5	5	1	1	1	1	1	3	1	1	4	1	1	1	1	1	1	1	1	5	4	5	5	3	5	1	3	1	5	3	5	1
26	4	2	3	4	1	2	4	2	3	1	1	1	2	1	1	3	2	2	3	2	5	1	1	2	2	2	1	2	1	2	1	2	1	2	1	1	2	2	3	3	3	3	1	1	1	1	1	5	3
27	4	4	4	4	1	3	4	4	5	4	2	2	3	4	4	2	4	4	2	4	5	4	4	4	4	4	4	2	1	1	2	4	2	2	2	4	2	4	2	3	4	3	3	3	4	3	4	3	2
28	5	3	4	4	1	2	3	3	1	5	3	1	2	1	3	3	4	3	4	3	4	1	3	2	2	2	2	4	1	3	2	3	1	2	1	2	3	2	1	3	3	2	3	3	3	2	1	3	2
29	4	4	4	5	3	4	4	2	4	3	4	2	2	2	2	4	3	4	4	1	3	4	2	2	2	3	3	2	2	2	4	2	1	3	2	3	4	2	3	2	3	2	2	2	2	2	3	3	3
30	4	5	4	4	1	1	5	2	4	3	1	2	2	2	3	3	5	1	3	3	4	2	3	4	1	3	3	2	2	2	1	2	1	2	1	3	2	3	3	2	2	1	1	1	1	1	2	4	3
31	4	4	4	4	2	4	4	4	4	4	4	2	3	2	4	4	4	2	3	4	4	3	2	3	2	3	3	2	2	4	4	4	2	4	2	3	3	3	3	3	3	4	3	4	3	3	3	3	2
32	5	4	4	4	2	3	4	3	4	4	2	2	2	2	4	4	4	2	4	3	2	2	2	2	1	2	3	2	2	1	1	2	1	1	1	3	4	2	1	2	3	1	2	2	4	2	3	3	1
33	4	2	4	3	2	1	3	2	2	2	3	1	1	5	1	4	2	3	3	3	4	2	1	3	3	2	2	2	1	1	2	4	1	1	2	1	4	2	3	2	2	1	1	3	1	1	3	2	2
35	3	5	5	5	2	1	4	2	5	3	3	1	2	2	1	4	4	2	5	3	5	1	3	4	2	2	3	4	2	2	3	3	1	2	2	1	4	3	3	4	4	4	2	2	3	2	4	3	2
36	4	4	4	4	3	1	4	3	4	3	3	4	3	2	2	3	3	3	3	5	5	5	2	2	2	2	2	1	1	1	1	3	1	1	1	1	3	3	3	3	3	3	3	3	3	3	3	3	3
37	4	4	4	2	2	4	4	4	4	4	4	2	4	3	3	4	2	2	4	4	4	4	3	3	3	4	4	3	2	4	4	4	3	3	2	2	4	4	3	2	4	2	2	2	3	3	4	4	2
38	4	4	5	4	2	3	4	4	4	4	3	2	3	2	3	4	4	4	4	3	5	3	2	4	3	3	4	2	2	3	4	4	1	3	2	3	4	4	2	3	4	2	3	3	3	4	4	3	3
39	4	4	3	4	1	2	4	1	3	3	2	3	3	1	2	3	4	2	4	3	4	3	3	3	2	2	3	2	2	3	2	3	2	2	2	3	3	3	3	3	2	3	2	3	3	2	2	3	4
40	4	3	4	4	1	2	3	4	4	2	2	4	3	3	2	4	4	2	2	2	5	2	1	4	2	2	2	4	1	4	2	3	3	4	1	2	2	4	3	2	4	2	2	3	2	2	2	4	2
41	4	4	4	4	2	2	4	4	2	2	1	2	2	1	1	4	3	2	4	2	5	3	2	3	3	3	3	2	1	2	2	3	3	3	2	3	3	3	1	2	3	2	1	2	3	2	3	4	3
42	5	5	4	3	5	1	5	4	5	5	5	4	4	3	5	4	1	2	4	4	4	2	4	4	4	4	3	3	3	3	4	4	3	4	2	2	4	3	3	5	5	3	4	4	3	3	3	3	2
43	4	4	4	3	1	2	3	3	4	4	2	1	3	1	2	4	4	2	4	3	3	1	2	2	2	1	3	2	2	3	1	2	1	1	1	2	3	3	3	1	3	2	1	3	3	3	3	3	3
44	2	5	4	3	1	2	5	1	4	3	1	2	4	2	2	4	4	1	4	4	4	3	4	2	2	1	1	1	1	3	1	2	1	4	1	2	3	3	3	2	3	5	5	4	3	2	2	4	1
45	4	4	4	4	2	3	4	4	3	3	2	1	2	1	2	3	3	2	4	1	3	2	3	3	2	3	2	2	1	2	1	2	1	2	2	1	2	3	2	1	4	2	2	2	2	2	3	3	2
46	5	4	4	4	2	3	3	4	4	3	4	3	3	4	3	2	3	4	3	3	5	3	3	4	1	3	3	2	2	3	3	4	3	3	1	3	2	3	3	2	2	3	3	3	3	3	2	3	2
47	3	5	3	3	2	5	3	3	4	2	5	4	5	4	3	3	3	5	2	2	4	4	2	4	4	3	2	3	2	3	2	4	3	3	3	3	3	4	3	3	4	2	4	3	4	4	4	4	5
48	2	4	4	2	2	3	4	4	4	2	4	4	4	2	2	3	4	4	3	2	4	2	2	2	2	1	3	2	1	1	2	1	1	1	2	1	3	4	3	3	3	2	2	3	1	3	1	3	4
49	4	4	3	2	3	4	4	4	4	2	4	3	3	3	2	2	4	4	3	2	4	3	4	3	4	4	4	4	3	3	4	4	2	4	3	4	3	4	4	4	3	3	2	1	3	3	1	4	4
50	4	4	4	3	3	4	4	4	3	3	4	4	4	4	3	3	4	4	3	4	5	3	4	3	4	3	3	3	4	3	3	3	3	2	4	3	2	3	4	4	3	3	3	3	4	4	2	3	3
51	4	3	3	3	1	2	4	5	3	5	3	4	3	3	2	3	3	2	4	4	5	3	2	3	3	4	4	2	2	4	4	4	3	1	3	3	2	4	4	3	3	4	2	4	3	3	2	2	4
52	4	4	2	2	1	1	5	1	4	2	4	4	4	5	1	2	4	1	4	2	5	4	1	4	1	4	4	4	1	2	1	4	1	4	2	4	4	2	5	1	2	5	1	5	4	2	1	4	2
53	5	5	4	3	2	3	4	4	5	5	3	3	4	2	3	3	4	3	3	3	4	3	3	3	3	3	3	3	3	3	3	3	3	3	3	3	3	3	3	3	3	3	2	3	3	3	2	3	3
54	4	3	4	4	2	3	3	2	3	3	4	2	2	1	3	5	4	3	4	2	2	2	2	2	2	2	2	2	2	3	2	2	1	1	1	2	4	3	2	2	4	3	3	3	2	2	3	3	2
55	5	5	3	2	1	2	3	3	3	4	2	4	4	1	3	4	4	2	4	2	4	2	3	3	2	3	2	1	1	2	4	4	2	3	2	2	3	3	4	2	3	5	4	4	2	3	2	2	2
56	2	3	4	2	2	2	4	4	3	3	2	3	1	3	2	4	2	2	4	2	2	3	2	3	2	1	1	1	2	1	3	1	1	1	2	3	3	3	4	3	2	3	2	3	2	2	2	3	3
57	5	5	5	4	4	1	5	3	4	4	2	2	3	2	1	3	4	2	4	3	4	1	1	1	3	1	1	1	1	2	2	2	3	4	2	2	2	4	4	2	2	1	2	5	2	2	3	4	3
58	4	4	4	4	2	1	4	1	4	2	2	1	1	1	2	4	2	2	4	3	5	4	2	3	2	3	4	2	1	3	2	3	1	2	2	3	4	2	3	1	4	2	1	3	3	2	3	3	2
59	4	5	5	5	2	2	4	4	4	4	3	1	2	1	2	3	4	2	5	5	4	1	2	3	3	3	3	1	1	1	1	1	4	4	2	3	3	3	4	2	3	1	4	4	4	4	3	4	4
60	5	5	5	2	1	2	3	1	5	5	2	2	2	2	4	4	4	2	4	4	4	2	2	2	2	2	2	3	3	4	2	3	2	2	2	2	4	2	3	2	2	4	2	4	3	3	3	3	3
61	5	4	5	5	2	3	3	3	4	5	2	2	2	4	3	4	5	3	5	3	5	5	2	5	2	5	2	2	2	4	2	4	4	3	2	3	4	3	2	3	3	3	2	4	4	3	2	4	2
62	5	5	5	5	1	1	4	3	4	3	2	2	3	1	3	4	4	2	4	3	3	3	3	3	2	2	2	2	2	2	2	2	2	2	2	3	3	3	4	1	3	3	3	3	3	3	3	3	3
63	5	5	5	5	5	2	5	4	5	5	3	3	5	5	2	2	4	3	5	3	4	3	2	3	2	3	2	4	2	5	3	4	3	3	2	4	2	4	4	2	4	4	2	2	4	3	1	4	4
64	3	4	4	3	1	1	4	4	3	3	3	1	2	1	3	4	5	2	3	1	5	2	1	1	1	2	1	2	1	3	4	2	1	1	1	1	3	3	3	3	3	2	1	3	2	2	2	2	1
65	5	3	4	5	1	2	5	5	2	3	2	4	5	1	1	4	2	2	4	4	5	2	3	2	1	1	2	4	3	5	1	3	1	4	1	3	4	4	3	2	3	2	1	3	4	1	3	1	4
66	5	4	5	3	2	2	4	4	4	4	2	2	3	2	3	4	4	2	4	3	4	4	4	3	4	3	4	2	2	4	2	3	2	2	4	4	3	3	3	2	4	2	2	3	3	2	3	4	3
68	4	4	4	3	2	3	4	4	1	4	4	2	3	4	3	2	3	4	4	4	4	4	2	2	4	2	4	1	1	2	2	4	3	4	4	4	3	3	4	4	4	4	2	4	4	4	3	4	3
70	4	4	4	3	1	4	3	5	2	3	4	2	4	2	1	1	2	4	3	4	4	3	4	4	4	4	3	3	3	2	5	4	2	2	3	2	1	4	5	2	3	5	3	5	4	3	2	4	4
71	3	4	2	2	4	2	4	3	2	4	4	4	4	3	3	2	4	3	4	4	4	3	3	3	4	4	2	2	2	2	2	2	2	2	3	2	2	3	4	2	3	4	3	3	4	4	2	4	3
72	5	4	4	4	1	2	5	3	5	5	2	2	2	1	2	4	4	2	4	4	5	2	2	4	2	3	2	1	1	1	4	3	1	1	1	2	3	3	4	2	3	1	1	1	3	2	3	4	3
73	1	1	5	3	1	1	1	5	1	3	1	5	3	1	3	3	1	1	5	5	1	1	1	1	2	1	1	1	1	1	1	1	1	1	1	1	2	5	4	1	5	1	1	1	5	1	4	5	1
74	4	4	4	4	3	3	4	3	3	4	3	3	3	2	3	4	4	3	4	3	3	4	3	3	3	3	3	2	2	2	2	4	2	2	2	3	3	3	3	3	3	2	2	3	2	3	3	3	3
75	3	4	3	3	4	4	4	3	3	3	4	4	4	4	3	3	3	4	3	2	3	4	4	3	3	3	4	3	3	2	2	2	3	4	2	2	2	3	3	2	2	4	3	2	2	2	3	3	3
76	5	2	4	4	4	2	4	1	2	2	2	3	4	2	2	4	4	2	3	4	4	4	2	2	2	2	4	2	2	2	2	2	2	2	2	3	4	3	4	2	3	2	2	1	1	2	3	2	2
77	4	4	4	4	2	2	4	2	4	3	2	2	3	2	2	4	4	2	4	3	4	3	2	3	2	3	3	2	2	2	2	3	2	2	2	2	4	3	3	2	3	3	2	2	2	2	3	2	3
78	4	4	4	4	2	3	4	4	3	3	3	4	4	3	2	4	2	4	3	2	4	3	2	3	3	2	3	4	4	3	4	3	2	4	2	3	4	3	3	3	4	2	3	3	3	3	3	2	4
79	5	4	4	5	4	2	3	3	2	4	3	3	2	3	2	4	4	2	4	4	3	3	4	3	3	3	4	1	1	4	3	4	2	4	3	4	4	2	4	4	3	1	3	4	4	4	3	2	2
80	4	4	4	4	2	4	4	4	5	3	4	4	4	4	4	4	3	4	4	2	3	3	3	4	3	3	3	3	2	3	3	4	2	2	2	3	2	3	4	2	3	3	2	2	2	2	2	3	3
81	5	4	4	3	3	4	4	1	5	1	4	3	3	4	2	4	5	5	3	4	5	5	4	4	3	4	4	4	1	3	3	4	2	4	2	4	3	3	5	3	2	4	2	4	3	2	3	3	3
82	3	3	4	3	2	3	4	4	3	3	2	3	2	2	2	3	3	2	3	2	3	3	2	4	3	4	3	2	2	2	3	3	3	4	3	3	3	3	4	4	3	3	3	4	2	3	3	3	3
83	3	4	3	4	3	3	3	2	3	2	3	4	4	2	2	3	4	3	3	3	4	4	3	3	2	3	3	2	2	2	2	2	2	3	2	2	3	3	3	3	3	3	3	3	4	4	2	2	2
84	4	2	4	4	4	4	2	2	1	3	4	4	3	4	3	4	2	4	4	5	3	1	2	3	2	2	1	2	3	2	1	2	2	3	2	1	3	3	3	4	3	2	3	2	2	2	3	2	3
85	4	5	4	4	2	2	5	3	4	3	4	3	4	2	2	3	5	3	5	3	5	2	2	3	1	1	2	1	1	2	1	3	2	2	2	2	4	4	3	3	4	2	1	3	4	2	2	4	4
86	4	4	4	3	4	3	4	3	3	4	3	3	4	3	3	3	2	3	3	3	4	3	3	3	3	3	3	2	3	2	3	3	4	3	3	3	3	4	3	3	3	3	3	3	3	4	2	3	3
87	4	2	4	5	2	4	2	3	3	5	4	4	4	2	4	4	1	4	5	3	4	4	3	4	4	4	4	4	4	4	4	4	5	5	4	4	4	4	4	4	2	3	4	2	3	4	4	4	4
88	4	3	3	4	4	3	3	4	5	3	4	4	3	2	2	3	3	4	3	2	5	3	3	3	3	4	4	4	2	4	1	5	2	2	3	4	2	5	4	3	2	5	4	3	4	4	1	4	4
89	5	5	4	4	2	2	4	3	4	4	4	2	3	2	2	4	2	2	4	3	4	2	4	4	4	4	4	2	2	3	2	4	3	4	3	4	3	3	3	4	3	3	2	3	2	3	2	4	3
90	4	4	4	4	2	2	4	4	3	3	3	2	2	2	2	4	4	2	3	2	4	3	2	4	4	4	2	2	2	2	3	3	2	3	2	3	3	4	4	3	4	3	3	3	2	3	2	3	3
91	3	3	4	2	3	3	3	5	4	4	3	2	3	3	4	3	3	3	4	4	3	3	2	3	3	3	4	2	1	2	2	4	2	5	3	4	1	4	3	4	2	3	4	5	4	4	2	4	5
92	5	3	4	3	3	5	3	5	2	3	5	5	3	2	1	3	2	5	5	4	5	4	4	3	4	4	5	5	1	5	5	3	3	2	3	5	3	5	5	1	3	2	3	2	4	3	2	4	4
93	5	4	4	4	4	1	5	1	4	5	1	3	1	1	4	4	5	1	4	5	5	2	4	4	5	4	4	4	2	4	4	5	1	4	4	4	4	2	1	1	5	2	4	2	4	3	2	4	4
94	4	4	4	5	1	4	4	4	4	3	4	2	2	1	1	4	3	3	4	4	5	2	2	2	3	2	3	2	2	2	2	2	2	3	2	2	3	2	2	3	4	1	2	1	3	2	3	3	2
95	4	4	3	3	2	4	4	4	4	4	3	3	3	2	3	4	4	3	4	3	4	3	2	2	2	2	3	2	2	3	2	3	3	3	3	2	3	4	4	4	3	1	2	3	3	2	2	3	4
96	3	4	4	3	3	3	3	3	3	3	3	3	3	2	2	3	3	3	3	2	4	3	3	3	4	3	3	2	2	2	3	3	2	3	3	3	3	3	4	3	4	2	3	2	3	3	3	3	4
97	4	5	3	4	4	2	3	4	4	5	2	4	4	2	5	3	4	2	3	2	3	2	2	2	4	2	2	2	2	4	2	2	2	3	3	2	2	2	4	4	2	2	3	4	2	3	2	4	4
98	4	3	2	2	4	2	4	3	4	3	2	4	4	3	2	2	1	2	3	3	2	2	2	4	4	4	2	2	1	1	4	4	4	4	4	2	2	4	4	5	3	3	3	3	2	3	2	4	4
99	5	5	3	4	5	4	3	4	5	5	5	5	5	3	4	3	5	5	5	5	4	1	1	2	1	2	4	1	1	2	1	3	3	4	3	4	2	3	5	3	3	2	2	4	3	2	2	4	3
100	4	4	4	4	1	2	4	4	4	4	4	1	2	1	4	4	4	2	4	4	5	2	2	3	4	2	2	3	2	4	3	2	1	2	1	1	1	2	1	4	3	2	1	1	2	1	2	4	2
101	4	4	5	4	2	4	4	4	4	2	4	2	3	2	2	4	4	4	4	4	4	2	2	2	2	2	2	2	2	2	2	2	2	2	2	2	4	2	2	2	4	3	2	2	2	2	2	2	2
102	4	4	4	2	2	3	4	2	4	3	1	2	3	3	2	4	4	3	4	3	5	2	4	5	4	4	3	4	4	4	5	5	5	4	3	3	2	3	3	4	2	3	3	4	3	3	2	4	4
103	4	4	4	2	2	4	4	4	4	4	4	4	4	2	3	2	2	4	4	4	4	2	2	3	2	3	3	2	2	2	2	2	4	4	4	3	2	2	4	4	3	4	3	3	2	3	2	4	4
104	4	3	3	3	2	1	3	3	3	2	3	4	3	4	1	4	2	2	3	2	4	3	4	4	3	2	4	2	4	3	2	2	1	3	1	3	2	2	3	3	3	3	1	1	2	2	2	3	3
105	5	5	4	5	3	3	4	4	4	2	2	3	3	2	2	4	5	2	3	4	5	2	4	3	2	2	2	3	2	3	2	3	2	4	2	2	3	4	4	3	2	3	2	3	4	3	2	3	2
106	4	2	3	4	2	5	4	5	2	2	4	5	2	4	2	4	3	4	4	4	4	4	3	3	4	4	3	2	2	2	2	4	3	3	4	4	3	4	4	4	4	3	3	4	3	3	2	4	4
107	4	4	3	3	2	1	4	2	4	2	1	2	2	3	2	3	3	1	3	3	4	2	3	3	2	3	2	3	1	4	2	4	1	3	3	2	3	3	2	2	4	4	2	1	1	1	3	3	2
108	4	4	4	3	2	3	4	4	4	3	4	2	2	2	3	4	4	2	3	3	4	2	2	3	3	4	3	2	2	3	3	4	3	4	3	3	3	3	3	3	3	3	2	3	4	3	3	3	3
109	5	4	4	4	2	2	4	4	4	3	2	3	2	2	2	4	3	2	3	4	4	2	2	3	3	3	1	2	3	2	1	3	2	2	1	1	3	3	4	3	3	3	2	2	2	2	3	3	2
110	2	4	2	4	2	3	4	2	3	4	3	4	2	4	2	2	3	3	2	4	4	3	3	2	2	2	3	2	3	4	2	4	2	3	3	2	4	2	4	3	4	4	3	4	3	4	3	2	3
113	4	4	4	4	3	2	4	4	3	4	2	2	2	2	3	4	5	2	4	3	4	1	3	1	3	2	3	2	1	2	2	3	1	3	2	2	3	2	3	2	4	3	1	2	3	2	4	3	2
114	4	4	5	5	3	2	4	2	3	3	3	4	3	4	2	5	4	2	4	3	5	1	1	2	4	1	1	4	4	1	5	3	2	4	4	2	2	4	4	4	3	2	2	4	3	3	3	4	3
115	4	5	4	4	3	4	3	3	2	3	3	2	4	2	3	4	1	4	2	4	4	5	3	4	4	4	4	3	2	2	2	4	3	2	2	4	4	4	4	4	4	3	3	2	3	4	3	3	3
116	5	5	5	4	1	2	5	3	5	5	2	1	1	1	4	2	4	2	4	4	5	1	1	2	1	1	4	1	1	2	1	1	1	1	2	4	3	2	4	4	4	1	3	1	4	4	3	4	3
118	4	3	4	4	2	2	4	4	2	4	4	2	4	2	2	4	4	2	4	2	4	2	3	3	3	3	2	2	2	2	2	3	3	3	3	2	3	3	3	3	4	2	2	2	2	2	3	3	2
119	4	4	4	4	2	2	3	4	4	4	3	3	4	3	3	4	4	3	4	3	4	3	2	3	2	2	2	2	2	2	2	2	2	2	2	2	4	3	2	2	4	3	2	3	3	3	3	2	2
121	5	5	4	3	2	3	3	3	5	2	4	4	3	2	1	3	3	3	4	3	5	4	2	2	2	2	3	1	1	1	1	1	1	1	1	3	3	3	4	2	2	3	2	1	1	1	1	3	2
122	3	3	3	2	3	1	2	4	2	3	1	2	4	2	2	2	4	2	3	4	4	1	2	2	3	2	4	1	1	2	1	2	1	2	2	3	3	4	4	3	3	2	2	3	3	4	2	4	3
123	4	4	4	3	4	2	4	1	4	4	1	1	1	2	3	4	4	1	3	3	4	1	1	1	1	1	1	1	1	1	1	1	1	1	1	1	4	1	1	1	4	1	1	2	1	1	2	2	1
124	4	4	3	3	1	3	4	3	4	2	1	2	1	1	1	5	3	1	2	1	5	4	5	4	3	5	3	5	1	4	4	4	3	2	2	4	2	4	3	1	3	3	1	4	1	1	2	3	3
126	5	5	5	5	3	5	5	4	5	5	4	4	4	3	3	2	4	3	3	2	5	3	3	3	3	4	3	3	2	3	3	3	2	3	2	3	3	3	2	3	3	4	4	4	3	3	2	3	3
127	4	5	3	3	1	4	2	2	5	3	3	2	4	1	1	4	5	3	5	3	3	1	4	2	2	1	3	3	2	2	1	1	2	3	1	1	3	1	3	2	2	2	1	2	2	2	1	3	1
129	5	4	5	4	3	5	3	3	5	4	3	3	3	3	3	4	4	4	3	4	4	4	4	4	4	4	4	4	4	3	3	4	4	4	4	4	4	4	4	4	4	4	4	4	4	4	4	4	4
130	4	4	3	2	3	2	4	2	4	4	2	4	3	3	4	3	4	2	3	3	4	4	3	3	3	3	4	2	2	3	3	3	2	2	3	4	3	3	3	3	3	2	3	3	3	3	2	3	3
131	5	5	5	5	1	3	4	3	5	3	3	1	2	2	2	4	4	4	3	4	4	4	5	4	3	3	3	3	3	4	4	3	1	2	2	2	3	3	2	2	3	3	2	2	4	3	2	3	3
132	4	3	3	2	2	2	4	3	3	4	4	4	3	3	4	2	3	2	4	3	5	4	2	4	3	4	4	2	1	2	2	3	3	4	3	3	2	4	4	4	3	2	4	5	4	4	2	4	3
133	4	4	5	2	1	2	3	5	4	3	3	1	1	1	3	3	5	2	4	3	4	1	2	1	2	1	1	2	1	1	5	3	1	1	1	1	2	3	4	4	3	2	4	3	1	3	2	1	1
134	4	5	3	2	2	1	5	1	5	4	2	2	2	1	1	2	5	2	4	3	4	2	2	1	2	1	2	1	1	2	1	3	1	1	1	3	2	3	4	4	3	5	1	4	1	3	1	4	2
135	3	4	5	4	5	4	4	4	5	5	4	1	3	1	4	3	4	4	4	5	4	1	5	3	1	3	4	1	1	1	1	1	1	1	1	1	1	1	3	3	4	1	4	3	5	4	3	4	3
136	4	4	4	3	2	3	3	3	4	4	3	2	3	2	2	3	2	2	4	3	4	3	5	3	3	3	4	3	3	2	2	3	3	4	3	3	2	3	2	3	3	1	4	4	4	4	2	4	3
139	4	5	4	4	2	4	4	1	3	2	1	3	2	1	2	4	4	3	4	4	5	2	4	4	4	4	4	3	1	2	4	4	3	4	3	3	4	4	4	2	4	3	1	1	4	2	3	4	2
140	5	5	2	1	1	2	4	3	4	1	1	3	3	1	3	4	3	2	3	2	5	3	3	2	4	2	1	1	1	2	1	1	1	2	2	2	3	3	4	3	2	5	4	3	3	4	2	3	3
141	4	1	3	5	1	5	1	5	2	5	3	5	5	5	5	5	1	5	5	1	5	5	5	5	4	5	5	5	3	5	5	5	1	3	4	5	3	5	5	5	5	1	1	5	5	3	3	5	3
142	4	3	4	3	4	3	4	4	3	4	2	2	4	4	3	4	2	2	4	4	3	2	2	2	2	2	2	1	1	4	1	4	1	2	2	2	3	4	4	4	3	4	1	1	2	2	2	2	4
143	4	4	4	4	2	4	4	3	4	2	4	4	2	4	2	4	2	4	3	2	2	2	2	2	2	2	2	2	2	2	2	2	2	2	2	2	3	4	3	3	2	4	2	2	2	2	2	2	3
145	4	5	5	4	2	3	5	2	4	4	4	3	3	3	3	4	4	4	4	2	4	2	2	2	2	2	2	2	1	2	2	2	2	2	2	2	3	3	2	2	4	2	2	2	2	2	2	2	2
146	3	4	4	3	2	5	4	4	4	3	5	4	4	4	2	3	4	5	3	5	5	3	5	3	2	5	4	2	2	4	2	4	2	4	4	3	3	3	4	4	3	3	3	2	4	4	2	4	4
147	4	4	5	5	1	2	4	4	4	4	2	1	1	1	2	5	5	2	4	3	2	2	1	2	2	2	1	1	1	2	2	2	1	1	1	1	4	1	3	2	5	2	1	1	1	1	3	2	1
148	3	4	4	3	1	4	4	5	5	5	5	1	1	1	3	3	3	3	4	3	5	1	4	1	1	1	1	4	4	1	3	1	3	3	3	1	3	4	3	2	3	2	3	1	5	4	3	3	3
149	4	4	4	4	2	2	3	2	3	5	3	2	2	1	4	4	4	3	5	5	4	2	2	2	2	2	3	1	1	3	1	1	2	2	2	2	4	2	3	3	3	3	3	4	3	3	3	3	3
150	5	5	5	3	3	2	3	1	3	2	1	1	1	1	1	3	4	1	4	2	2	1	2	3	1	2	1	1	1	1	2	2	1	1	1	1	3	3	2	1	3	2	1	2	2	2	3	2	2
151	4	5	3	4	1	2	3	3	4	2	2	3	3	3	2	4	3	1	3	2	2	5	3	3	3	2	4	2	2	2	2	2	2	2	3	4	3	3	4	3	3	3	3	2	2	2	2	4	3
152	5	5	4	4	3	2	5	2	5	2	3	2	3	2	1	3	4	3	4	3	5	2	3	4	3	4	2	1	1	1	5	5	3	2	2	2	3	2	4	3	2	3	2	4	4	2	2	5	3
153	3	2	3	3	4	2	3	4	4	2	4	4	4	4	1	4	1	4	4	4	5	3	5	5	4	4	3	4	3	4	3	4	2	4	4	3	4	4	5	5	3	2	3	5	4	4	1	4	4
154	3	4	4	4	3	3	3	3	4	3	3	3	3	3	3	3	3	3	3	3	3	3	3	3	3	3	3	3	3	3	3	3	3	3	3	3	3	3	3	3	3	3	3	3	3	3	3	3	3
155	5	5	3	5	3	1	4	3	3	4	1	4	4	4	3	4	4	1	2	4	3	4	2	2	2	4	4	2	2	4	2	2	1	2	4	4	2	3	4	4	3	4	2	4	1	2	1	3	2
156	3	3	4	4	4	4	3	2	2	3	2	4	4	4	2	4	3	2	4	2	3	4	4	4	4	3	4	3	3	2	3	3	2	2	2	4	3	3	3	3	3	2	2	3	2	2	2	3	2
159	4	4	4	4	2	2	3	2	4	2	4	3	3	2	2	3	4	2	4	3	5	1	3	4	3	3	2	5	2	2	2	2	3	2	2	1	3	3	3	2	3	4	3	3	3	2	2	3	3
160	5	4	3	3	2	2	4	3	4	4	4	2	4	3	3	3	3	2	3	4	5	2	3	3	3	3	2	1	1	2	4	3	1	4	2	1	3	4	4	2	2	4	4	3	3	4	2	3	3
161	3	4	3	4	1	3	2	1	3	3	1	3	3	2	1	4	2	2	3	2	5	5	4	3	2	3	4	2	1	2	3	2	1	1	3	4	3	2	3	1	2	3	1	1	1	2	2	2	2
162	3	4	4	4	2	2	3	1	4	2	1	1	2	2	2	4	4	1	4	2	4	2	3	3	3	3	3	3	2	3	2	3	3	2	2	2	4	2	1	2	3	3	2	3	3	2	3	2	3
163	5	3	4	3	1	3	2	3	3	3	3	1	2	1	3	2	2	3	5	2	5	2	2	4	3	2	2	2	2	1	2	3	2	2	2	2	3	2	2	2	4	2	2	3	2	2	2	2	3
164	5	4	3	4	2	5	4	3	3	4	3	4	3	3	2	3	2	4	3	4	4	2	3	3	3	4	3	2	2	3	4	3	2	2	2	3	3	2	3	4	3	2	3	2	2	4	2	3	4
165	4	4	4	5	5	5	1	3	3	3	3	3	3	3	1	5	1	5	5	3	5	3	1	5	3	5	2	2	2	2	2	5	1	2	1	1	4	1	4	1	3	3	3	3	3	3	3	3	3
166	4	3	4	4	3	4	3	5	3	3	4	2	3	2	2	4	5	4	4	3	3	2	1	3	1	2	2	1	1	3	2	1	1	1	1	2	3	3	3	2	3	4	3	3	2	2	2	3	2
167	4	4	4	5	4	5	4	3	4	3	5	5	5	4	3	4	5	4	3	3	5	4	4	3	3	3	3	3	3	3	4	3	2	3	2	3	4	4	4	2	3	4	4	3	4	4	3	4	4
168	3	5	4	5	2	3	3	3	3	3	2	4	4	2	1	5	4	2	4	3	5	3	1	3	2	3	1	2	1	3	4	4	1	2	2	2	3	4	4	2	3	1	3	3	3	3	3	3	3
169	3	4	5	4	2	3	3	1	3	3	3	2	2	2	2	4	1	2	5	2	4	3	3	2	2	2	2	3	3	2	2	3	2	4	2	3	4	2	3	2	4	2	3	3	2	3	4	3	2
170	3	5	4	5	1	2	5	3	4	2	2	1	2	1	1	4	4	1	5	2	2	3	2	4	1	4	2	4	3	2	5	4	2	4	1	3	3	3	2	2	2	2	3	2	2	3	3	2	4
171	4	4	4	4	2	3	3	4	4	3	1	3	3	2	2	3	4	2	3	3	5	3	3	3	2	3	3	3	2	2	3	3	2	2	2	2	4	2	3	2	3	3	3	1	3	2	3	3	3
172	5	5	5	5	3	1	4	1	4	3	2	1	1	1	1	4	3	1	4	3	3	1	2	2	3	2	2	1	1	2	3	3	1	2	3	2	3	2	1	1	3	2	1	4	3	1	3	2	1
174	3	5	4	4	1	3	3	2	3	2	4	3	4	3	2	4	4	4	5	3	4	4	4	3	1	3	2	1	1	1	3	2	1	3	1	3	5	2	1	1	5	1	3	3	4	2	5	4	2
175	4	5	5	4	3	2	4	4	4	4	1	4	3	1	2	4	4	4	4	5	4	2	2	4	4	4	4	2	1	2	2	4	2	2	2	2	4	4	3	3	4	4	2	3	3	2	3	3	4
176	5	4	5	5	4	4	4	2	5	3	4	5	3	3	2	4	3	3	4	4	5	2	3	5	3	5	1	2	2	2	5	5	3	4	3	3	3	2	5	3	3	4	4	5	4	4	3	3	4
178	5	5	5	5	3	3	3	3	4	4	2	3	3	4	3	3	3	3	3	3	3	3	3	3	3	3	3	3	3	3	3	3	3	3	3	3	3	3	3	3	3	3	3	3	3	3	3	3	3
179	4	4	4	4	2	2	4	4	3	4	2	3	4	2	4	4	2	2	4	4	4	3	4	4	2	4	4	3	2	2	5	5	2	4	2	3	3	4	4	4	4	5	3	4	4	3	2	4	3
180	5	4	5	5	3	3	3	2	4	2	2	3	3	4	2	4	3	2	5	2	4	3	5	3	3	3	2	2	1	1	1	1	1	2	3	2	3	2	2	2	3	2	2	2	2	2	2	2	2
181	5	5	5	5	2	1	1	1	4	3	1	1	1	1	1	5	5	2	5	5	1	1	1	1	1	1	1	1	1	1	1	1	1	1	1	3	3	3	3	4	4	4	3	5	3	3	3	1	1
182	4	4	4	5	1	2	3	2	4	3	2	2	2	2	2	4	3	3	4	2	4	2	3	3	2	3	2	4	2	2	2	2	2	2	2	2	3	3	4	2	2	3	2	4	2	3	3	3	3
183	4	3	4	5	2	4	3	2	3	4	5	3	3	3	3	4	4	5	4	3	4	3	4	3	3	4	4	3	2	3	5	4	2	3	2	3	3	2	3	3	3	2	3	3	2	2	3	2	2
184	4	5	5	5	4	2	5	1	5	1	2	4	4	2	1	3	2	4	4	2	5	2	3	3	2	3	2	1	2	1	1	3	1	2	1	2	3	3	4	3	4	3	2	4	2	5	3	4	4
185	5	5	4	4	2	3	5	2	5	3	3	4	1	1	1	5	3	3	5	1	4	3	4	3	3	2	4	1	1	1	4	2	1	3	1	1	3	3	3	1	3	1	1	1	1	1	3	3	2
186	3	4	2	2	4	4	4	4	4	3	4	4	4	3	2	3	2	4	2	3	5	3	3	5	5	5	3	2	3	4	4	4	2	4	3	4	1	4	5	4	3	3	4	4	2	3	4	4	2
188	4	4	4	4	2	3	4	4	2	2	2	2	3	4	2	4	3	4	4	4	5	5	4	5	5	5	4	5	3	5	5	5	3	4	4	5	3	3	5	4	5	5	3	5	5	3	2	5	5
189	4	4	3	3	2	2	3	3	3	3	2	3	3	3	2	4	4	2	3	3	4	3	3	2	3	3	3	2	2	2	2	2	2	2	3	2	3	3	3	2	3	3	3	2	2	3	2	3	3
190	2	2	5	4	1	2	4	3	3	2	2	1	2	2	2	3	3	3	5	1	4	2	2	3	2	3	1	1	1	1	4	2	1	1	1	1	3	2	3	2	3	3	1	2	1	1	3	3	1
191	1	1	1	1	1	2	4	3	4	2	2	3	3	2	3	4	4	3	4	4	4	3	3	3	3	3	2	2	2	2	2	2	2	2	2	2	4	2	2	2	4	3	2	2	2	2	4	3	2
194	5	4	4	3	2	3	3	3	3	3	3	4	3	3	3	3	3	3	3	3	3	3	3	5	3	5	3	5	3	3	3	3	3	5	3	3	3	3	3	3	3	3	3	3	3	3	3	3	3
195	4	3	3	5	2	2	3	4	4	2	3	3	4	1	2	4	4	2	4	2	5	2	2	4	2	5	2	1	1	2	5	4	3	3	2	2	3	3	4	2	3	5	3	2	2	2	3	2	3
196	5	4	3	4	2	2	2	1	3	2	3	3	2	5	2	4	4	2	3	2	5	3	4	3	4	3	3	2	2	4	1	3	2	3	2	2	3	3	4	2	4	2	4	3	2	3	2	3	2
197	4	5	4	3	2	3	4	4	5	4	3	2	3	1	2	3	4	3	3	1	5	3	3	3	2	3	2	2	1	2	2	2	2	3	2	2	3	2	3	3	3	2	4	4	3	4	3	3	4
198	5	5	5	5	1	1	5	1	5	3	3	1	2	1	3	4	4	1	5	3	5	1	3	3	3	3	3	3	3	3	5	5	3	3	3	3	5	1	1	1	3	5	3	3	3	1	3	3	3
199	4	4	4	2	2	3	4	4	4	3	4	2	3	4	2	3	4	3	4	3	4	2	3	3	4	3	3	3	3	2	3	3	2	4	3	4	4	3	3	3	3	3	3	4	3	3	2	3	3
200	5	5	3	5	3	3	3	2	3	3	1	3	3	3	1	3	3	2	3	3	3	3	3	3	3	3	3	3	3	3	3	3	3	3	3	3	3	3	3	3	3	3	3	3	3	3	3	3	3
201	4	5	5	5	1	2	4	1	5	2	2	3	4	4	2	5	5	2	5	5	2	4	2	2	2	2	2	1	2	2	1	2	1	1	1	4	4	3	3	2	4	2	1	1	2	3	3	2	2
202	3	5	3	5	2	1	4	1	4	3	1	4	3	1	1	4	4	1	4	2	3	1	2	2	2	2	1	1	1	1	1	1	1	1	1	1	3	3	3	2	2	3	2	2	2	2	3	2	3
203	4	4	3	3	3	4	3	4	3	3	2	4	2	4	3	4	4	2	3	4	4	2	2	3	4	2	3	3	3	3	2	4	2	4	2	4	3	3	2	2	3	3	3	4	2	2	3	3	3
205	4	2	4	3	4	1	4	4	5	2	3	3	2	3	3	4	4	2	4	5	4	2	3	3	4	3	4	3	4	4	5	3	4	2	4	3	4	3	2	4	4	3	3	5	3	3	2	3	3
206	4	5	4	2	2	3	4	1	4	3	3	4	4	4	3	3	3	3	3	4	4	3	3	4	3	3	3	3	3	3	3	3	3	3	3	3	3	3	3	3	3	3	1	3	3	3	3	3	3
207	4	4	3	4	3	3	3	3	4	4	2	3	4	2	2	4	2	2	4	3	4	3	3	2	2	2	2	2	2	2	3	3	2	2	2	2	4	3	4	3	4	3	3	3	2	2	3	3	3
208	4	5	3	4	2	3	4	2	5	2	3	2	2	4	2	4	3	3	3	2	5	2	2	3	2	4	2	2	2	2	2	4	2	4	2	3	2	3	2	2	2	2	2	3	2	2	3	2	2
209	3	4	3	4	3	2	4	2	3	3	2	4	3	2	2	3	4	2	3	2	4	3	2	3	3	2	2	2	2	2	2	3	2	2	3	2	3	3	4	1	3	2	2	3	2	3	2	3	3
210	4	4	4	4	4	4	4	4	4	4	4	4	4	4	4	4	4	4	4	4	4	4	4	4	4	4	4	4	4	4	3	4	4	3	4	3	4	3	2	3	3	3	3	2	3	3	3	3	3
211	4	3	4	4	4	5	2	4	3	3	3	2	2	2	2	3	4	3	4	4	4	3	3	3	1	2	1	1	1	1	2	2	1	1	1	1	2	2	3	2	4	2	1	4	2	1	3	2	2
212	4	5	4	4	2	1	5	2	5	1	5	2	2	1	1	2	4	2	2	4	5	2	4	4	1	4	1	4	1	3	1	4	1	1	1	1	3	4	4	3	4	1	1	1	1	4	3	2	5
213	3	3	4	4	2	3	4	1	4	3	4	2	4	2	2	4	2	2	4	3	4	4	3	2	3	2	4	2	3	2	2	1	1	1	2	4	4	2	3	1	3	3	4	3	3	3	3	3	2
214	5	5	4	5	1	1	4	1	4	5	1	1	4	1	1	4	5	1	4	5	5	1	1	4	4	3	1	3	1	1	1	3	3	3	1	1	3	4	4	1	3	3	1	1	4	1	1	4	3
216	5	5	3	5	1	2	5	1	5	5	3	5	4	4	2	5	5	1	5	3	5	3	4	3	2	4	4	1	1	4	1	2	2	1	2	2	3	4	2	1	3	1	4	1	4	2	3	3	3
217	5	5	5	5	1	3	5	4	5	3	3	3	3	2	1	3	4	3	5	5	4	2	4	3	1	2	3	4	1	1	3	3	1	4	1	2	2	2	1	1	3	2	2	2	2	3	2	5	4
218	4	5	4	3	2	2	4	3	4	3	3	3	3	3	1	4	4	2	4	3	3	2	2	2	2	2	2	1	1	2	1	2	1	2	2	2	4	2	3	2	3	3	2	2	3	2	2	3	2
220	2	4	2	2	1	2	4	2	4	4	2	1	1	1	2	2	4	4	2	2	4	1	2	2	3	2	1	1	1	1	1	3	2	1	2	1	2	4	4	2	2	3	3	3	4	2	1	4	4
221	5	5	5	5	2	3	5	4	4	1	4	4	4	4	2	5	4	2	4	4	4	2	2	2	2	2	2	1	1	1	1	1	1	1	1	3	5	2	1	1	5	1	1	1	1	1	5	1	1
222	5	5	4	4	2	3	3	4	3	4	2	2	2	1	2	2	4	2	5	3	4	2	2	3	3	4	2	2	1	2	3	3	2	2	3	2	3	2	2	2	4	1	2	4	2	3	3	2	2
223	3	4	3	4	4	3	3	3	3	4	3	4	4	4	2	2	2	3	2	3	3	1	2	2	1	2	1	1	1	1	1	3	1	1	4	1	2	4	4	3	2	3	4	5	4	4	2	4	4
224	5	4	4	4	1	1	4	2	5	5	1	2	3	1	3	5	5	1	5	3	4	1	1	1	2	1	2	1	1	1	1	1	1	1	1	1	5	1	1	3	2	1	1	1	1	1	5	2	2
225	5	5	3	3	3	1	5	3	4	3	1	3	3	3	2	4	5	1	4	5	1	1	3	1	2	1	2	1	1	1	1	2	2	1	2	1	3	3	3	2	3	1	3	2	3	2	3	3	3
226	5	5	5	4	2	2	5	2	4	2	3	4	4	4	2	4	4	2	4	4	4	3	4	4	3	4	4	2	2	4	4	4	2	4	2	4	4	3	2	1	4	3	2	5	3	3	4	3	2
227	4	5	3	3	4	5	3	4	3	3	4	3	4	3	2	3	4	5	4	3	4	2	2	4	2	5	3	2	2	2	4	4	3	2	3	3	3	2	3	3	3	2	3	3	3	3	2	3	2
228	4	4	3	2	3	4	4	4	3	3	2	3	4	2	2	3	3	4	4	4	5	5	5	3	4	4	3	5	4	2	4	4	2	5	4	5	2	5	5	4	4	4	3	3	4	3	2	4	5
229	5	4	4	5	1	3	4	3	5	5	5	5	5	5	5	5	5	5	5	5	5	5	5	5	5	5	5	5	5	5	5	5	5	5	5	5	5	5	5	5	5	5	5	5	3	3	3	1	3
230	5	5	5	4	2	3	4	2	4	3	3	2	3	2	2	4	4	4	4	4	4	2	2	3	3	3	3	3	3	3	3	3	3	3	3	3	3	3	3	3	3	3	3	1	3	3	3	3	3
231	5	4	4	5	1	1	3	4	4	3	1	3	3	1	3	4	4	2	1	3	5	3	3	3	2	2	2	2	2	2	3	2	1	3	2	3	4	2	3	2	3	3	3	2	2	2	3	2	2
233	4	4	4	4	2	3	3	3	4	3	2	3	2	2	2	4	3	2	3	4	3	2	3	2	2	2	2	2	3	2	2	2	2	2	2	3	3	2	3	2	3	1	3	3	2	3	2	3	2
234	4	5	5	5	2	3	4	3	4	3	2	3	3	2	2	4	4	2	4	2	3	2	2	3	2	3	3	2	1	1	1	3	1	1	2	1	3	3	2	2	3	3	3	2	2	2	3	2	2
235	5	4	4	3	3	2	3	3	4	4	3	3	3	3	2	4	4	3	4	3	3	3	3	3	3	3	3	3	3	3	3	3	3	3	3	3	3	3	3	3	3	3	3	3	3	3	3	3	3
236	5	5	4	5	3	2	4	2	5	2	2	3	3	3	2	4	4	3	4	4	5	3	4	4	4	3	3	4	3	3	4	4	3	4	3	3	3	3	2	2	3	4	3	3	4	3	2	3	3
237	5	4	4	4	3	2	4	3	3	4	2	3	4	3	3	5	3	2	4	3	5	3	3	3	3	4	4	3	2	2	2	3	2	2	2	4	4	3	2	2	3	1	2	1	2	2	2	2	2
238	5	4	4	4	3	4	4	4	5	5	5	2	3	2	3	5	5	4	4	5	5	2	5	5	2	5	5	2	2	4	5	5	3	5	2	4	4	2	3	4	4	3	1	1	3	1	3	1	2
239	4	5	5	5	2	2	5	1	4	4	2	1	3	2	4	5	3	2	3	4	5	2	3	4	3	4	3	3	3	3	3	4	2	3	3	3	5	4	4	2	4	2	4	5	3	2	2	4	3
240	3	4	4	4	2	4	4	2	4	3	4	2	2	1	2	4	3	4	3	3	3	2	2	2	3	3	3	3	3	3	3	3	3	3	3	3	3	3	2	2	4	2	2	2	2	2	3	3	2
241	4	4	4	5	1	1	4	1	4	2	1	3	2	1	1	4	5	1	4	2	4	1	3	3	3	3	3	3	2	1	1	2	1	1	2	2	3	3	2	2	4	2	3	2	2	3	2	3	2
242	4	4	3	3	2	2	2	2	2	2	2	3	3	2	2	4	3	2	3	2	2	3	3	3	3	3	3	2	2	2	2	3	2	2	3	3	3	3	4	3	3	3	3	3	2	2	3	3	3
244	5	4	4	4	2	1	1	4	1	2	1	4	4	1	1	4	4	2	4	2	4	1	1	2	3	3	2	3	1	4	3	3	2	3	2	2	2	3	3	2	3	3	2	3	1	3	2	4	3
245	3	4	4	4	1	1	4	1	4	1	1	1	1	1	2	5	3	1	3	1	2	2	3	3	1	1	3	3	2	3	3	3	1	1	1	1	4	1	2	1	4	1	1	1	2	1	4	1	1
246	4	5	4	3	2	3	5	2	2	3	3	3	3	2	2	5	1	3	4	3	5	3	4	3	1	4	4	2	2	1	2	4	1	4	1	4	3	3	3	2	3	5	3	2	3	3	1	2	2
247	4	4	4	4	3	4	3	5	5	5	5	5	5	2	4	2	3	3	3	3	4	4	4	4	3	3	3	3	3	3	4	3	1	3	3	3	3	3	3	3	5	3	5	5	3	3	5	5	5
248	5	5	5	5	2	3	5	3	4	2	2	2	2	2	4	5	5	1	4	4	2	2	3	3	2	4	4	3	2	1	4	3	2	2	2	3	4	2	2	3	3	2	2	3	2	2	3	2	2
249	2	5	5	3	2	4	5	2	5	5	2	4	5	5	4	4	4	3	5	5	2	2	1	2	2	4	3	2	4	3	2	3	1	2	2	3	4	2	3	3	3	4	3	3	3	4	3	3	2
250	4	4	4	4	2	2	2	4	4	2	1	1	2	1	1	4	4	2	4	4	4	2	2	2	2	2	3	3	2	2	2	2	2	3	3	3	3	4	2	3	3	2	2	4	2	2	3	3	3
252	5	5	5	5	5	5	5	5	5	5	5	5	5	5	5	5	5	5	5	5	5	5	5	5	5	5	5	5	5	3	3	4	3	4	4	4	3	4	4	3	3	4	4	3	3	4	4	4	3
253	4	4	4	4	1	2	4	3	4	3	2	4	3	4	4	4	4	4	4	4	4	4	4	4	4	4	4	4	4	4	4	4	4	4	4	4	4	4	4	4	4	4	4	4	4	4	4	4	4
254	5	5	3	3	5	2	4	2	4	3	2	4	4	4	2	3	3	2	3	2	5	4	4	2	4	3	4	2	2	4	2	2	2	2	2	3	3	4	4	4	3	5	4	5	4	4	1	2	2
255	4	4	4	4	4	2	4	2	4	3	2	3	3	3	2	4	3	2	4	3	4	3	3	3	2	3	3	3	3	3	3	3	3	2	3	3	3	2	2	3	3	2	2	2	2	2	3	2	2
256	5	5	5	5	3	2	5	1	4	5	2	1	4	4	5	5	5	1	5	4	2	2	1	2	3	3	2	3	1	2	2	3	1	2	1	2	1	1	1	2	5	1	2	2	3	2	4	3	2
257	3	4	4	4	2	2	3	4	4	4	4	3	4	3	2	4	4	3	4	3	4	3	2	3	2	3	4	2	1	2	1	2	2	1	2	4	3	2	3	2	4	3	3	2	3	2	3	2	3
258	4	5	2	5	3	2	5	5	5	1	2	5	5	3	1	3	1	1	3	3	5	5	1	5	1	5	5	1	1	2	1	5	3	5	1	5	2	5	5	5	3	5	2	4	4	4	1	4	5
259	5	5	3	3	2	4	5	4	5	3	2	3	4	3	2	3	4	3	3	3	3	1	4	4	4	4	3	3	3	3	1	3	4	2	3	2	3	4	4	3	3	5	3	3	4	4	2	4	4
260	3	5	4	3	3	3	3	2	4	3	4	3	3	2	3	3	4	3	5	2	5	2	2	2	2	2	2	2	1	3	1	1	1	1	2	1	1	2	2	2	3	3	2	2	2	2	2	2	2
261	3	2	2	2	5	5	3	5	3	2	5	5	5	5	1	3	1	5	3	1	4	1	2	2	2	1	1	1	1	1	1	1	1	1	1	1	3	2	2	2	2	1	1	1	3	2	3	3	4
262	5	5	4	3	2	3	5	5	5	3	4	5	3	3	1	2	4	4	5	4	5	5	3	5	5	5	5	5	5	5	5	5	5	5	5	5	2	1	5	5	1	2	2	2	2	2	1	5	5
264	4	4	4	3	2	2	3	3	3	4	3	4	4	2	4	4	4	3	4	3	4	2	2	4	4	4	2	4	2	4	5	5	2	4	3	2	2	3	3	4	3	3	3	5	5	3	3	5	4
265	5	5	4	3	2	5	5	5	5	3	5	2	4	3	2	4	5	5	5	4	5	5	5	4	4	3	3	5	3	5	5	5	3	4	4	3	3	3	5	3	4	4	2	3	4	3	2	4	3
267	4	5	4	4	2	4	4	3	5	4	3	3	3	1	3	3	5	3	4	3	5	3	1	3	3	3	2	1	1	2	4	2	1	2	2	2	3	3	3	3	3	3	2	3	3	3	2	3	3
268	5	5	4	5	1	1	5	1	5	3	1	3	3	3	3	5	3	2	4	3	4	2	2	2	3	3	2	2	2	2	3	3	1	2	2	2	3	3	1	1	4	2	1	1	1	1	3	2	1
269	4	4	4	5	3	3	4	4	3	3	3	4	3	4	3	4	3	4	4	3	4	3	3	3	2	4	4	4	3	3	2	3	2	2	1	3	4	3	3	3	4	3	2	2	3	3	4	3	2
270	3	4	2	3	3	2	3	3	2	2	2	3	2	3	1	3	2	2	4	2	2	4	3	3	2	2	3	1	1	1	1	3	2	2	1	4	3	3	4	3	2	2	1	1	2	1	2	3	2
271	5	5	5	5	1	1	3	5	5	5	1	1	1	1	2	2	5	1	1	1	5	1	4	3	1	3	2	1	2	1	1	1	1	1	1	1	2	1	3	2	3	3	3	5	3	3	1	1	5
272	4	3	3	2	3	3	3	3	4	3	4	4	3	3	3	2	2	2	3	3	3	3	3	4	4	4	4	3	4	3	2	3	3	2	2	3	2	2	4	2	2	2	2	2	3	3	3	3	3
273	4	5	4	4	1	3	4	4	4	4	5	2	4	1	2	4	3	4	4	2	4	1	2	1	2	2	2	2	2	2	4	4	2	2	4	2	4	2	2	4	3	3	2	1	2	2	2	3	3
274	5	5	4	4	1	4	4	4	2	3	2	3	3	2	2	4	2	3	2	4	5	3	3	4	2	4	3	2	1	2	1	4	1	2	3	3	4	3	4	2	2	3	2	2	4	2	3	2	2
276	5	5	3	4	3	3	5	4	5	4	3	2	2	3	4	3	5	2	4	5	4	3	2	3	1	2	2	1	1	2	1	1	1	1	1	2	3	4	4	2	2	3	1	2	3	2	2	4	4
277	4	4	4	4	3	2	4	2	3	3	2	2	2	2	2	4	2	2	3	3	2	2	2	2	2	2	2	2	3	2	2	2	2	2	2	2	3	2	3	2	3	3	3	2	2	2	2	2	2
278	4	4	3	4	2	4	4	5	2	3	4	3	3	3	2	4	4	3	3	2	4	1	3	4	4	1	2	1	1	2	1	2	3	4	1	1	3	4	4	2	3	4	2	2	3	2	3	4	2
279	4	4	5	4	2	3	4	5	3	4	5	3	4	1	3	4	4	2	4	4	4	3	3	3	2	3	2	3	2	3	3	4	3	2	2	3	4	3	2	2	4	2	2	3	3	2	3	2	2
280	4	5	4	3	3	4	5	5	5	3	4	5	3	3	3	3	3	3	3	4	4	4	3	4	5	5	3	3	3	3	3	4	3	4	5	3	2	4	4	4	3	3	3	2	3	4	3	3	4
281	4	5	5	3	4	3	4	2	4	4	3	4	4	2	3	4	3	3	4	4	4	4	3	4	4	2	3	3	2	4	4	4	3	4	4	3	4	4	4	4	4	5	2	4	3	3	2	4	2
282	5	5	4	3	1	4	4	5	4	1	5	3	2	5	1	4	5	5	5	4	5	3	3	5	5	5	5	1	1	1	1	2	1	1	4	3	3	4	5	3	2	3	5	5	5	4	1	5	5
284	5	3	3	5	4	3	4	3	3	5	3	4	4	4	4	3	1	3	4	5	5	5	5	5	5	5	5	5	5	5	5	5	5	5	5	5	3	4	4	4	4	3	4	4	4	4	2	4	5
285	4	4	4	4	4	2	4	3	4	4	3	2	3	2	2	4	4	2	4	2	2	2	3	2	2	2	2	2	2	2	3	2	3	2	2	2	3	2	3	3	4	3	2	2	2	2	3	2	2
287	5	4	4	4	3	1	4	4	4	2	2	4	4	2	2	4	4	2	4	4	4	2	2	4	4	4	4	4	2	2	2	5	4	4	4	4	2	4	4	4	3	4	2	2	4	3	2	4	3
288	3	3	5	5	1	4	5	5	2	3	4	2	3	3	2	4	4	4	4	2	4	2	3	3	4	2	3	1	2	2	1	2	1	2	2	2	4	3	2	2	3	3	3	3	3	3	3	4	3
290	5	5	4	4	2	2	5	1	5	4	2	1	4	1	2	4	5	2	4	2	4	1	1	1	2	1	1	1	3	1	1	1	1	1	1	1	3	4	3	1	3	1	3	1	1	1	2	2	3
291	4	5	3	4	3	3	4	2	3	2	2	3	3	3	2	4	2	2	2	4	4	2	3	3	3	3	3	2	2	2	2	3	1	2	3	3	3	3	3	3	2	4	3	2	3	3	2	3	4
292	5	4	3	5	3	2	3	3	4	5	2	3	3	2	3	3	5	2	3	4	4	3	4	3	2	2	3	4	1	4	1	3	1	3	1	2	3	3	3	1	3	3	2	3	3	2	3	3	2
294	5	5	4	5	1	2	5	2	5	5	1	2	4	2	4	4	4	2	4	3	2	2	1	2	1	1	1	1	1	1	1	2	2	2	1	2	4	2	2	2	4	1	2	1	1	1	3	4	2
295	4	5	3	2	2	4	4	4	2	4	2	4	4	3	2	4	2	3	4	5	5	2	1	4	4	4	4	3	2	2	1	2	2	4	4	2	4	4	4	4	3	4	2	2	4	4	3	4	3
296	4	5	4	2	1	1	5	5	5	1	1	3	5	5	1	5	2	1	4	1	5	5	1	4	3	4	4	2	1	1	2	4	1	4	4	4	3	3	4	4	3	3	2	2	1	2	1	3	4
297	1	2	5	4	4	5	4	2	1	2	4	3	5	5	2	5	2	3	3	2	3	3	4	3	2	1	2	2	1	1	1	2	1	4	2	3	5	2	2	4	5	2	1	1	1	2	4	3	2
298	4	4	4	4	1	5	5	5	5	5	2	4	4	1	3	5	5	5	5	4	3	2	3	2	3	4	3	3	2	3	3	2	2	5	3	3	3	3	2	3	3	3	3	2	3	3	4	3	3
299	5	5	4	5	2	3	5	2	5	4	3	3	2	4	3	4	4	2	4	2	4	3	3	3	3	3	3	3	2	2	2	2	2	2	2	2	3	2	2	2	3	2	2	2	2	2	3	3	2
300	4	4	3	3	3	2	4	4	4	3	2	2	3	2	2	3	3	2	3	4	4	3	3	4	3	4	2	4	2	2	4	3	2	3	3	3	3	4	3	3	3	2	3	4	4	3	2	3	3
301	3	5	4	4	1	4	5	1	5	4	4	2	2	2	3	4	4	3	4	2	4	2	3	3	2	4	3	2	2	2	2	2	2	2	2	2	3	3	3	2	3	3	3	3	3	3	3	2	3
302	4	4	4	4	2	1	3	1	3	2	2	2	3	2	1	4	3	2	4	3	3	3	2	2	2	2	2	2	1	2	2	3	2	2	2	2	4	2	2	2	4	2	2	2	2	2	3	3	2
304	4	5	4	3	4	2	4	2	4	3	3	4	3	3	2	3	3	2	4	4	3	3	2	4	3	3	3	4	3	1	2	3	2	3	2	2	3	2	3	3	3	4	3	3	3	3	3	3	4
305	5	4	3	4	2	2	3	2	4	4	3	4	3	2	3	2	2	2	4	2	5	3	4	5	4	4	3	2	2	2	4	5	3	3	2	3	3	2	3	3	3	3	3	3	3	2	3	3	3
307	5	4	4	5	1	1	4	1	4	1	1	3	3	2	1	4	4	1	4	2	4	1	3	3	3	2	2	2	1	2	1	1	1	1	1	3	4	3	3	3	3	2	2	1	2	3	3	2	3
308	4	4	4	4	2	3	3	2	3	5	3	2	3	2	4	4	4	3	4	4	3	2	2	2	2	3	2	2	2	3	2	3	2	2	4	2	3	3	3	2	4	3	2	2	3	2	3	3	3
309	5	5	2	2	3	3	4	3	5	5	4	4	4	3	2	1	4	4	2	3	3	3	4	3	5	4	3	3	1	1	5	4	1	4	3	3	3	3	5	2	1	5	5	4	5	4	1	4	3
310	4	4	4	4	1	1	4	2	4	1	1	3	3	2	1	5	4	1	4	1	3	1	3	1	1	1	1	1	1	1	1	1	1	1	1	1	4	1	2	1	3	1	1	3	1	1	3	3	1
313	4	4	3	3	2	3	3	1	4	3	3	2	2	1	1	4	4	3	4	3	4	3	2	2	2	2	2	2	2	2	2	2	2	2	3	3	3	3	3	3	4	4	3	3	3	3	3	3	3
315	1	3	4	3	2	2	3	5	2	3	3	4	3	3	1	3	1	3	2	2	3	4	2	3	3	4	3	2	1	2	2	4	2	2	3	3	3	4	4	3	2	3	2	2	2	2	2	4	4
316	5	5	5	5	5	3	5	5	5	5	1	5	5	3	3	4	4	2	5	5	4	2	2	4	2	4	2	2	2	2	2	3	1	1	2	3	3	4	4	4	3	4	4	3	2	3	2	4	3
317	3	5	4	3	1	4	4	4	4	3	3	4	4	3	2	3	5	3	3	1	3	2	3	3	3	4	4	3	3	3	3	3	1	3	1	2	2	2	2	3	3	2	2	3	2	3	3	3	3
319	4	5	4	2	1	5	4	1	4	4	4	3	1	1	3	4	4	3	4	3	5	4	3	2	2	2	3	2	1	1	1	1	1	3	1	1	4	5	3	3	3	5	1	5	3	3	2	4	3
320	3	4	3	3	3	2	3	4	3	4	4	3	3	3	3	4	3	3	3	3	4	4	3	3	4	3	3	3	2	3	4	3	3	4	4	3	3	3	4	4	4	3	3	3	3	2	3	3	3
321	4	5	4	3	2	4	4	4	5	4	2	2	3	2	3	4	4	2	4	4	5	3	2	4	3	3	2	2	2	2	4	3	2	4	3	4	3	3	4	1	3	3	2	4	4	3	3	4	3
322	5	5	5	5	1	4	5	5	5	5	5	4	3	5	5	5	5	5	2	5	5	1	1	5	5	4	1	5	1	1	1	4	1	1	3	1	4	3	4	4	4	2	2	1	3	1	2	2	5
323	4	4	4	5	4	3	4	3	3	1	3	4	4	3	4	4	4	3	4	4	5	3	5	4	3	3	3	3	1	3	3	3	3	2	3	2	4	3	3	3	3	3	4	4	3	4	4	3	3
324	3	4	4	3	2	4	4	4	3	2	3	4	4	4	2	3	4	4	4	3	4	3	2	3	4	2	4	2	2	2	3	3	2	2	3	3	4	4	4	2	3	4	1	1	4	2	2	4	4
325	5	5	5	3	3	2	4	3	4	5	3	2	3	1	2	3	4	2	4	4	4	3	1	2	3	2	3	3	2	2	3	2	1	2	2	2	3	2	3	2	4	2	3	3	3	3	3	3	3
327	5	5	4	3	4	4	5	4	3	2	5	4	2	3	2	4	5	4	5	3	5	1	3	4	5	3	2	5	5	4	3	3	1	2	4	1	2	3	4	5	2	5	5	4	3	4	1	4	2
328	2	2	4	2	2	1	1	2	2	4	1	4	5	4	4	2	1	1	2	4	4	4	4	4	4	2	1	4	1	1	2	3	2	2	3	5	3	4	4	3	2	5	1	4	1	1	2	2	4
329	3	2	4	4	2	2	4	4	3	3	2	2	2	2	2	2	4	2	4	2	4	3	3	3	2	2	2	2	1	1	2	2	2	2	2	2	2	2	2	2	4	3	2	3	2	2	2	2	2
330	3	5	4	5	3	3	4	2	4	3	5	4	4	1	3	4	4	3	4	3	4	3	1	2	2	3	3	2	1	1	1	3	1	1	2	1	4	1	1	1	4	3	1	3	4	1	4	2	1
331	3	5	4	5	2	5	5	5	5	3	5	4	2	2	3	5	4	4	5	4	5	3	4	5	4	5	4	3	3	4	5	5	5	5	3	3	3	4	5	3	2	5	2	5	3	4	2	5	4
333	3	3	5	5	2	2	4	5	2	3	4	2	2	3	1	4	2	3	5	1	4	4	3	3	4	3	3	1	1	1	3	3	2	2	3	3	3	4	3	2	4	2	2	2	3	3	2	4	3
334	4	5	5	4	3	4	4	2	4	4	2	1	3	3	4	4	4	2	4	4	4	2	1	1	1	2	1	1	1	1	1	3	1	1	1	1	3	2	2	1	3	2	1	2	3	1	3	3	2
335	5	5	5	5	1	1	4	3	4	4	4	3	2	1	1	4	4	2	4	3	2	3	2	3	2	2	2	2	1	1	1	1	1	1	1	2	3	3	1	2	3	1	3	3	3	3	3	3	2
336	5	5	4	4	3	5	5	3	5	1	5	3	3	3	1	2	3	5	3	3	4	4	4	4	3	4	4	2	1	3	4	4	1	2	1	3	2	4	3	4	3	5	4	4	4	4	2	4	4
337	4	5	5	5	2	4	4	5	5	1	5	1	5	1	1	4	5	5	5	5	5	4	4	5	3	4	4	4	2	4	2	5	3	4	2	5	4	3	5	1	5	2	2	1	4	3	4	4	3
338	4	4	4	4	2	3	3	2	4	4	3	2	3	2	2	4	3	2	4	2	4	2	2	2	2	2	2	2	2	2	2	3	3	3	3	3	3	3	3	3	3	3	3	3	3	3	3	3	3
339	5	5	5	4	3	3	4	2	5	3	2	4	3	1	1	5	4	2	5	1	4	4	4	5	4	5	1	2	1	2	5	4	3	1	1	1	5	3	2	2	5	2	1	4	4	4	4	4	1
340	4	4	4	4	3	3	2	2	3	3	4	2	4	3	2	4	4	4	3	2	4	2	2	3	2	2	2	2	2	2	2	3	1	2	2	2	4	2	3	3	3	2	2	3	4	3	2	3	2
341	3	4	3	4	3	4	4	3	4	3	4	3	3	3	3	3	3	4	3	3	4	4	3	3	3	3	4	4	3	4	4	3	2	3	2	4	3	3	4	3	3	3	3	3	3	3	3	3	3
342	5	5	3	4	4	4	5	4	5	4	5	4	4	3	3	3	5	4	4	4	5	5	4	5	5	5	5	5	5	5	4	5	3	4	4	5	3	5	5	5	5	5	5	5	5	5	5	5	5
344	5	5	3	2	1	3	4	5	3	5	3	3	2	3	4	2	4	3	3	4	5	2	3	4	5	1	4	4	3	1	3	4	3	4	4	3	2	5	5	4	3	4	4	4	4	4	3	4	4
345	4	4	4	4	4	4	4	4	4	4	4	4	4	4	4	4	4	4	4	4	4	4	4	4	4	4	4	4	4	4	4	4	4	4	4	4	4	4	4	4	4	4	4	4	4	4	4	4	4
346	4	4	4	4	3	3	4	3	4	3	3	2	3	3	2	4	3	3	3	3	3	2	2	3	3	3	3	3	3	3	3	3	3	3	3	3	3	3	4	2	4	4	2	4	2	4	2	2	3
347	3	3	3	5	2	3	3	3	5	3	3	3	4	2	2	3	3	3	2	3	4	3	2	4	2	4	2	2	2	1	1	4	2	2	2	2	2	2	3	3	2	3	2	3	2	2	2	3	4
349	5	4	4	5	2	2	4	4	3	4	2	3	3	2	3	3	3	2	4	4	5	3	3	4	2	4	4	2	3	3	4	4	3	4	3	3	3	3	3	3	3	3	2	3	3	3	3	3	3
350	3	2	4	4	1	5	3	1	3	4	5	2	1	2	2	4	3	5	5	2	4	1	3	2	1	2	3	1	2	3	2	2	1	2	1	2	4	2	2	3	4	2	3	3	2	2	3	2	2
351	4	4	4	3	2	2	4	2	4	4	2	2	2	2	3	3	4	2	2	3	4	3	2	2	3	4	4	2	2	2	4	4	2	2	3	3	4	3	4	3	4	3	2	3	3	2	2	3	2
352	5	4	4	4	1	3	5	1	4	4	3	3	3	1	3	3	3	3	3	3	4	3	3	3	3	2	2	3	3	3	2	3	2	3	2	2	4	2	2	3	4	3	2	3	2	2	3	3	3
353	4	5	3	3	3	2	4	3	4	4	2	4	4	2	3	3	4	2	3	4	4	3	4	4	3	4	4	3	2	2	5	4	2	3	2	3	1	3	5	2	2	3	3	3	4	3	2	4	4
355	4	4	4	4	3	3	4	3	4	4	3	1	2	2	3	3	5	3	5	5	4	3	2	3	3	3	3	3	2	2	3	3	2	2	3	2	3	3	3	3	3	4	3	5	4	3	3	3	3
356	5	5	3	4	2	4	4	2	4	2	4	2	4	3	2	3	2	4	3	4	4	4	2	1	3	2	4	4	2	2	1	1	1	2	3	4	2	4	4	3	4	2	4	4	4	4	3	3	3
357	5	4	4	3	2	2	4	4	3	4	3	3	4	2	3	3	3	2	3	4	3	3	4	3	3	4	3	2	1	3	3	3	2	3	2	2	1	2	2	3	1	4	3	4	3	3	1	4	1
359	4	3	4	4	2	3	3	3	3	2	2	3	2	2	2	3	3	3	3	3	4	3	3	3	2	3	3	2	2	2	2	4	2	4	2	3	2	4	3	3	3	2	3	3	3	3	2	3	2
360	3	3	3	3	4	4	4	4	3	3	3	3	3	3	3	3	3	3	3	3	3	3	3	3	1	2	4	4	1	1	2	2	2	2	2	2	3	2	2	2	2	2	2	2	2	2	2	2	2
361	4	5	4	3	2	2	5	2	4	3	3	2	3	2	3	3	2	3	4	3	4	1	2	2	3	3	3	1	1	1	2	3	2	3	3	1	2	2	4	2	3	3	2	4	3	3	1	3	4
362	5	5	5	4	2	2	5	4	5	4	2	2	4	2	2	4	5	2	3	2	5	3	2	2	2	2	4	1	1	2	5	3	1	2	2	4	3	4	4	4	2	2	2	3	4	4	2	2	5
363	4	3	3	3	2	5	3	4	1	2	4	4	4	4	3	4	2	3	3	3	4	3	2	4	1	3	4	1	1	1	2	3	3	3	3	3	2	4	3	2	3	2	2	2	3	2	2	3	2
364	5	3	4	2	3	2	4	2	3	4	4	4	2	2	1	4	4	2	3	3	4	2	2	3	1	2	2	3	4	2	1	2	2	3	2	2	2	3	3	3	3	5	4	3	3	3	2	3	4
365	5	4	4	3	3	3	3	2	1	3	5	3	4	4	2	4	2	3	4	2	5	2	1	3	2	3	2	2	3	2	5	3	1	1	1	3	2	4	3	3	4	3	3	3	2	3	4	3	2
366	5	5	5	5	2	3	5	2	5	4	2	2	4	2	1	4	5	2	5	4	5	2	2	2	2	2	2	2	1	2	1	2	2	1	2	1	2	4	4	4	4	1	2	4	2	2	4	2	2
367	3	4	4	4	4	4	4	4	4	4	4	4	4	4	4	4	4	4	4	4	4	4	4	4	4	4	4	4	4	4	4	4	4	4	4	4	4	4	4	4	3	4	3	4	4	4	3	4	3
368	3	3	4	5	4	4	5	4	4	4	4	4	4	4	4	4	4	4	4	4	5	5	4	5	2	4	4	4	2	4	4	4	1	1	1	3	4	3	3	3	4	3	3	3	3	2	4	3	3
369	4	5	5	4	1	1	4	1	4	2	2	3	3	2	1	4	3	2	4	4	4	2	2	2	1	3	2	2	1	2	3	2	2	2	1	2	4	2	2	1	3	2	2	3	1	2	3	2	2
370	4	5	3	2	2	3	1	1	5	3	2	1	1	2	1	2	4	2	3	5	5	2	2	1	2	4	1	1	1	2	1	1	1	2	2	1	3	4	2	1	4	5	1	3	1	1	2	4	4
371	3	4	4	4	1	2	4	2	3	4	2	4	3	4	4	4	2	3	4	3	4	2	3	2	3	2	1	3	2	2	2	2	1	2	2	2	3	2	3	2	2	3	2	4	2	3	2	4	3
372	5	5	4	4	1	2	5	1	4	2	3	1	3	2	2	5	5	2	4	4	4	1	1	4	1	4	1	3	4	2	1	4	1	4	1	2	4	2	2	3	3	2	2	1	4	1	3	4	2
373	2	4	3	3	2	3	3	4	3	2	3	2	2	2	2	4	2	2	4	2	2	3	1	1	1	2	2	1	1	1	1	2	1	2	1	2	4	3	3	4	2	4	1	2	2	2	2	3	2
374	3	4	4	3	2	3	4	3	5	2	3	3	3	1	3	3	3	3	3	3	4	3	2	3	2	3	3	3	2	3	3	3	2	3	2	3	3	3	3	3	3	3	2	3	3	2	3	3	3
375	5	5	4	5	5	3	4	5	5	3	2	4	3	2	2	4	5	2	4	3	5	2	2	2	2	2	2	1	2	2	1	4	1	1	1	4	3	3	4	2	3	3	2	3	3	3	3	3	3
376	4	4	4	3	3	3	4	1	4	2	3	3	3	3	2	3	3	2	4	2	3	4	3	2	2	2	4	3	3	4	4	2	2	2	2	4	3	3	3	2	3	3	3	2	2	2	2	2	3
377	4	4	4	3	3	2	5	2	4	3	3	4	4	2	2	3	2	3	4	4	4	3	4	4	3	3	4	3	2	2	4	4	2	2	2	3	3	3	3	2	3	3	2	4	4	3	3	3	3
378	3	4	2	2	5	3	3	3	5	2	1	3	2	2	1	2	1	3	4	2	5	5	2	3	2	3	5	1	1	4	1	2	1	1	1	4	3	3	4	4	3	3	1	2	2	1	1	4	2
379	3	5	3	5	3	4	5	4	5	3	4	3	2	3	2	3	2	3	4	4	5	4	3	4	3	4	4	4	3	3	4	3	2	3	2	4	3	4	3	3	4	4	3	4	4	3	3	4	3
380	5	4	4	3	2	3	4	4	4	3	2	2	3	2	2	3	3	3	4	2	3	2	2	2	2	3	2	2	2	2	2	2	2	2	2	2	3	3	3	2	3	4	2	3	2	3	3	2	2
381	4	4	3	3	2	2	4	1	4	3	2	2	3	3	2	4	4	1	4	4	4	1	3	2	2	2	1	2	1	1	1	1	1	2	2	2	3	2	3	3	3	4	2	4	2	3	2	3	2
382	5	5	4	5	2	2	2	1	4	2	1	1	1	4	1	4	4	1	4	1	5	2	4	4	1	4	1	1	1	1	1	2	1	1	1	1	1	3	3	2	3	1	1	2	3	1	1	3	3
383	4	5	4	4	1	1	3	2	4	4	1	1	1	1	1	4	4	1	5	3	3	2	3	1	1	2	1	1	1	1	1	2	1	1	1	2	4	2	3	1	3	1	2	3	2	3	2	2	2
385	5	5	3	5	1	1	5	1	5	1	1	3	1	1	3	4	5	1	5	1	3	3	3	2	1	2	3	1	1	2	1	2	1	1	1	3	3	3	3	1	3	2	2	2	2	2	3	2	2
386	5	5	4	5	2	1	5	2	3	5	1	1	3	1	4	4	4	1	4	3	5	2	3	2	2	1	2	1	1	1	1	1	1	1	1	2	4	2	2	2	4	1	1	1	1	1	4	2	2
387	4	4	4	5	1	2	4	4	4	4	2	3	4	1	3	4	4	2	4	2	4	1	2	2	1	1	2	2	1	3	1	1	1	2	1	2	4	3	2	2	4	1	1	1	1	1	4	1	1
388	5	5	4	4	1	2	3	2	4	4	2	2	3	1	2	4	4	1	4	3	5	1	2	2	2	2	2	1	1	4	1	2	2	4	2	2	3	3	4	1	2	5	1	2	2	1	2	3	1
389	3	4	5	4	2	2	4	4	3	2	2	1	3	2	2	3	2	2	3	2	2	2	2	2	2	2	2	2	2	2	2	2	2	2	2	2	4	2	2	2	3	3	3	4	2	3	3	2	3
390	4	4	4	4	2	3	4	4	4	2	3	3	3	2	1	3	3	3	3	3	5	3	3	3	3	3	3	4	3	3	3	3	2	2	3	3	3	3	3	3	3	3	3	3	3	3	3	3	3
391	4	5	4	3	3	3	4	3	4	4	3	3	3	3	3	4	3	3	4	4	5	1	3	4	3	4	2	2	2	3	2	4	2	3	3	2	3	3	3	2	3	3	3	2	3	3	3	3	3
392	5	5	4	3	2	2	2	3	4	1	2	1	4	2	1	4	3	2	4	2	5	3	2	2	2	2	4	2	2	3	3	4	1	3	1	3	3	2	3	2	3	1	4	3	2	2	2	3	2
393	5	5	4	5	1	3	4	4	5	4	4	1	3	1	3	4	4	3	4	4	4	1	2	2	1	4	2	3	1	4	4	4	1	1	1	1	4	2	3	2	4	1	1	3	2	1	3	1	1
395	5	3	3	2	4	4	3	5	2	5	4	4	4	4	2	2	1	5	4	3	4	1	3	4	4	3	3	5	3	4	4	3	2	4	3	3	3	4	5	5	4	4	3	4	4	5	2	4	4
396	4	4	4	3	2	2	3	1	4	2	2	4	2	2	1	4	4	1	3	1	3	2	2	3	2	2	3	1	1	2	1	3	2	2	2	3	3	2	3	1	3	2	1	2	2	2	2	2	2
397	4	5	4	4	1	3	5	2	5	1	4	1	2	1	2	4	5	3	5	4	5	1	3	3	3	1	1	1	1	3	1	4	1	1	1	1	3	1	2	2	4	1	2	1	1	1	2	1	2
398	3	5	5	4	2	4	5	3	4	2	3	2	4	2	2	5	5	3	5	3	4	2	2	2	3	3	2	2	2	2	2	2	2	2	2	2	4	2	2	2	4	2	2	3	2	2	2	2	2
399	5	5	4	4	1	1	5	1	5	1	1	3	1	1	4	4	4	2	5	3	4	2	3	3	3	3	1	2	2	2	2	2	1	2	2	2	3	3	1	1	3	4	1	2	3	4	3	3	3
400	4	5	5	5	2	1	4	1	4	2	1	1	1	1	1	5	4	1	4	2	4	2	2	1	1	1	3	1	1	2	1	1	1	1	1	2	5	1	1	1	4	3	1	1	1	1	3	2	2
401	5	4	4	4	2	1	3	4	4	2	2	3	3	2	1	3	2	1	4	3	5	4	4	3	2	2	3	1	1	2	3	3	1	3	1	4	3	3	3	3	3	2	2	4	3	3	2	2	3
402	3	4	4	5	3	2	3	2	4	3	4	5	4	4	1	3	2	2	4	3	4	4	3	3	3	5	2	5	5	4	3	5	3	4	2	3	3	3	3	3	4	3	3	3	4	2	3	3	3
403	5	5	3	3	2	2	5	3	5	1	4	4	1	1	3	4	5	2	4	5	5	1	4	2	2	2	2	1	1	3	1	1	1	2	1	1	3	3	4	3	3	4	4	4	3	2	2	4	2
404	4	5	4	5	2	3	4	4	4	4	3	2	4	2	2	5	3	2	4	3	4	2	2	2	2	2	2	2	2	2	2	2	2	2	2	3	3	3	2	3	3	3	3	3	2	3	3	2	2
406	3	5	5	3	2	2	5	3	5	2	5	3	3	1	2	3	4	3	4	4	3	2	2	1	1	2	5	1	1	1	1	1	1	1	1	3	3	1	2	2	4	1	1	1	4	3	2	3	1
407	4	4	4	3	2	4	3	3	4	4	4	3	3	2	2	3	3	3	4	2	4	3	2	2	2	3	4	2	2	2	2	3	2	3	2	3	3	3	4	2	3	3	4	2	2	2	2	3	3
408	4	4	4	5	2	3	3	2	2	2	2	3	3	3	1	4	1	4	5	2	4	2	3	2	2	2	2	3	2	2	1	2	1	1	1	1	4	2	2	1	4	1	2	2	1	1	2	2	2
409	3	3	3	3	1	1	2	1	2	2	1	3	3	1	1	4	3	1	3	2	4	1	2	2	1	1	3	3	1	1	1	2	1	1	1	2	4	3	2	1	2	3	1	1	1	1	2	2	2
410	5	5	4	5	1	1	4	4	5	3	4	2	2	2	1	4	4	2	3	2	4	3	2	2	2	2	3	1	1	3	1	3	1	1	1	3	4	1	2	1	4	3	1	1	1	1	3	2	2
411	4	3	3	3	1	5	4	1	5	5	5	5	3	3	1	5	1	5	3	5	4	1	3	3	5	5	2	2	1	2	1	1	1	1	1	1	5	1	1	1	5	5	2	1	3	1	3	3	2
412	4	4	3	3	3	3	4	3	4	3	2	2	2	2	2	3	4	2	3	3	4	3	3	3	3	3	3	3	3	3	3	3	2	2	3	3	3	4	4	3	3	3	2	4	3	3	2	3	3
413	4	5	3	3	4	5	3	3	5	3	5	3	4	4	4	5	5	5	4	4	5	5	5	2	4	3	4	4	4	4	3	3	4	4	4	3	4	4	1	1	3	3	1	2	1	4	4	4	3
415	4	4	4	4	4	2	3	2	4	4	1	2	2	2	4	4	4	2	4	4	4	3	2	3	4	4	3	2	2	3	3	3	3	3	2	3	3	2	3	3	4	3	2	4	2	3	2	2	4
416	4	5	4	3	2	3	4	2	4	3	2	2	1	4	2	4	2	3	3	3	4	3	2	2	2	1	2	1	4	2	1	2	1	1	2	2	4	2	3	3	3	2	2	3	4	3	2	3	3
417	2	5	4	4	2	2	4	2	4	2	2	2	2	2	2	4	4	2	4	2	2	2	2	2	2	2	2	2	2	2	2	2	2	2	2	2	4	2	2	2	4	2	2	2	2	2	2	3	3
418	5	5	4	3	4	4	5	4	5	4	3	3	4	4	3	3	5	3	3	5	5	4	5	5	3	3	3	3	3	5	2	2	2	4	4	4	3	3	3	4	3	4	4	4	4	4	3	4	3
419	4	4	4	3	4	4	4	2	4	4	4	4	3	2	3	3	4	3	4	4	3	2	2	2	2	3	3	2	2	2	2	3	1	1	2	3	3	3	4	2	4	4	2	4	2	2	2	4	3
420	5	3	3	4	1	1	5	2	3	1	1	1	1	1	1	3	3	1	1	2	3	2	1	3	3	5	3	3	3	3	3	3	3	3	3	3	3	3	3	3	3	5	2	3	3	3	3	3	3
421	5	5	1	1	5	5	5	5	5	5	5	5	5	5	5	5	5	5	1	5	5	1	1	1	1	1	1	1	1	1	1	1	1	1	1	1	1	5	5	5	1	1	1	5	1	1	1	5	5
422	4	4	4	3	2	3	4	2	3	4	4	1	3	2	3	2	2	2	4	3	3	2	2	4	2	3	2	2	2	2	4	3	2	2	3	2	2	3	3	2	4	5	1	4	4	2	2	2	3
423	1	5	5	4	1	2	4	5	4	5	1	2	1	1	3	5	2	1	4	1	4	1	1	1	1	3	1	1	3	1	5	5	2	5	1	1	4	3	2	1	3	1	1	1	5	3	1	5	3
424	4	4	4	4	2	2	4	1	4	4	2	2	3	1	2	4	4	2	4	4	3	2	2	2	2	2	2	2	2	2	2	2	2	2	2	2	4	2	2	2	4	2	2	2	2	2	4	2	2
425	5	5	5	5	2	2	3	1	5	2	2	1	1	2	1	4	4	1	4	3	3	2	1	1	1	1	1	1	1	1	1	1	1	1	1	4	5	1	2	2	5	2	3	1	2	2	3	1	1
426	4	3	3	3	2	2	3	4	5	2	3	4	4	1	2	3	2	2	3	2	3	3	3	2	1	2	3	2	1	2	3	2	2	3	1	3	3	3	3	2	3	1	1	2	2	2	3	3	3
427	4	3	4	2	2	2	3	4	4	2	3	4	3	2	2	2	2	3	3	3	4	4	4	4	3	4	3	4	2	3	2	4	2	2	2	4	3	3	3	3	3	4	3	3	3	3	3	3	3
428	4	4	4	4	3	1	4	1	4	3	1	3	2	1	1	4	4	1	4	3	4	2	3	3	2	3	2	3	2	2	3	3	1	3	2	2	3	2	2	1	3	5	2	3	2	2	3	2	2
429	4	4	5	5	2	2	4	1	4	1	1	2	3	2	2	4	4	2	4	2	4	2	2	2	4	2	2	2	2	2	2	2	2	2	2	2	4	2	3	2	3	4	2	3	2	2	3	3	2
430	4	1	3	5	1	1	4	2	2	1	2	2	2	2	2	3	3	2	4	3	4	3	3	3	3	3	3	3	3	3	3	2	2	2	2	2	3	3	3	1	3	3	1	2	3	3	3	3	2
431	5	5	5	4	3	2	4	2	5	2	2	3	3	2	2	4	4	2	4	2	4	2	3	3	3	2	2	3	3	3	3	3	3	3	2	2	3	2	2	2	3	2	2	2	2	2	2	3	2
432	4	4	4	2	2	3	4	2	4	2	3	2	2	2	2	4	3	2	4	2	4	3	3	3	3	4	3	2	2	2	3	3	2	3	2	3	4	3	3	3	3	3	2	3	2	2	2	3	3
433	4	5	5	4	2	4	4	4	4	3	4	3	4	2	2	4	4	4	4	4	3	2	3	2	2	2	2	2	2	2	3	2	1	2	1	2	4	2	2	4	4	2	3	1	1	1	3	2	2
434	1	4	5	4	1	2	4	3	4	2	3	1	2	2	2	4	4	2	5	1	3	1	2	1	1	1	1	1	1	1	1	1	1	1	1	1	4	3	1	1	4	1	2	4	1	2	4	3	1
435	3	3	3	3	3	3	3	3	3	4	4	4	4	4	4	4	4	4	4	4	4	4	4	4	4	4	3	4	4	4	4	4	3	3	4	3	3	3	3	3	3	1	3	3	3	3	3	3	3
436	3	4	4	4	3	2	4	2	4	4	2	3	2	3	4	4	4	3	4	4	4	2	2	2	2	2	3	2	2	3	3	3	3	2	2	2	3	2	2	1	3	3	2	3	3	2	3	3	2
437	5	5	3	5	1	1	5	2	4	2	1	5	3	2	2	2	3	1	4	3	5	1	3	3	3	1	2	3	1	2	2	2	2	2	2	2	3	3	3	3	2	1	3	3	3	4	2	3	3
438	4	3	5	5	2	1	2	4	2	4	2	2	2	2	2	4	5	2	5	5	2	1	4	2	2	1	1	2	1	2	2	2	2	2	2	2	5	4	3	2	5	3	3	2	3	2	3	3	4
439	5	5	4	3	5	2	4	1	5	5	1	5	2	3	4	2	3	1	2	4	5	2	3	4	3	3	3	2	2	3	4	4	2	3	3	2	3	2	4	3	2	5	3	5	2	3	1	3	4
440	1	1	5	5	1	1	5	1	1	5	1	1	1	1	4	5	4	1	3	4	5	3	4	4	2	2	1	1	3	2	1	1	3	3	1	1	3	1	3	2	3	3	3	2	2	3	3	3	5
441	4	4	3	5	2	3	4	4	3	2	4	4	4	3	1	3	4	3	4	3	1	3	3	3	3	2	2	1	2	1	1	1	3	3	3	3	3	3	3	3	2	1	1	3	3	3	2	4	4
442	4	4	5	3	2	2	4	3	3	4	3	3	3	3	3	4	3	3	3	3	3	3	3	2	2	3	2	2	2	3	3	1	1	1	1	4	4	2	2	1	3	1	2	2	3	3	3	3	3
443	4	4	4	4	2	1	4	3	3	3	1	2	2	2	1	4	2	1	4	4	4	2	2	1	2	4	2	4	2	2	2	2	3	2	1	1	3	2	2	3	3	4	3	3	4	3	2	4	2
444	4	4	4	4	2	3	4	1	4	3	3	3	1	1	3	4	3	2	4	1	4	4	3	4	1	4	3	3	3	3	4	4	2	3	1	4	4	1	3	3	4	4	1	2	2	2	1	2	3
445	2	3	2	2	3	4	4	2	2	3	4	4	4	4	1	2	4	4	4	1	5	5	4	4	3	4	3	3	5	3	5	4	3	4	2	4	3	3	4	4	3	3	3	4	3	3	3	4	3
446	3	3	3	4	3	5	3	4	2	2	5	4	3	5	1	3	2	5	3	3	4	3	3	3	3	2	4	1	1	3	2	3	2	3	3	3	2	4	4	3	2	4	3	4	5	3	2	3	4
447	5	5	5	4	3	3	5	3	4	2	3	1	3	1	1	4	4	2	4	4	4	3	3	4	4	2	2	1	2	1	1	4	1	3	2	2	3	4	3	1	3	5	1	2	2	1	2	3	2
448	4	4	4	4	3	2	4	2	4	3	2	3	2	2	3	4	4	3	3	2	3	2	2	2	2	2	3	2	2	1	2	3	2	2	2	3	4	3	4	2	2	3	2	3	3	2	2	4	2
449	5	5	5	3	3	3	5	2	5	3	1	5	3	1	1	5	5	2	5	1	5	3	2	3	1	2	2	1	3	1	5	3	1	3	1	2	3	3	3	3	3	3	4	4	1	3	3	2	3
450	4	5	4	4	2	1	4	5	5	3	1	1	2	2	2	2	3	2	2	4	2	1	1	5	3	4	1	1	1	1	5	4	3	1	4	1	3	4	4	4	3	4	1	3	4	4	2	4	4
451	5	4	4	4	2	2	4	2	4	3	4	4	3	3	2	3	3	2	3	3	5	2	4	5	2	4	4	3	1	3	4	3	2	3	2	3	4	4	3	2	3	2	3	3	3	3	3	3	3
452	3	5	4	5	3	2	4	4	3	4	2	2	2	1	3	4	4	2	4	3	5	2	2	4	3	3	2	3	1	3	2	2	2	3	1	3	3	2	2	3	4	2	2	2	2	2	3	4	2
453	4	4	3	3	2	4	4	4	4	2	2	2	4	3	2	4	3	2	3	2	4	4	2	2	2	2	3	2	3	2	2	2	2	1	1	2	3	2	3	3	4	2	4	4	3	2	2	3	2
454	5	5	5	5	2	2	4	3	5	1	2	3	3	3	3	3	3	3	3	3	5	1	1	2	2	1	2	1	1	1	1	1	1	1	1	1	1	1	1	1	1	1	1	1	1	1	1	1	1
455	4	3	4	3	1	1	2	3	4	4	1	4	3	3	2	2	3	2	3	4	5	3	3	4	3	2	3	3	3	2	1	3	2	2	2	3	2	4	4	4	3	3	4	3	4	4	3	4	4
456	5	5	3	4	1	2	4	3	4	4	4	4	4	2	1	4	3	1	3	2	5	3	4	4	5	3	2	5	1	3	3	3	1	1	3	3	4	3	3	1	3	3	1	4	3	1	3	3	3
457	4	5	2	4	2	4	4	4	5	2	1	2	2	2	1	4	3	2	3	2	5	5	5	5	5	3	5	5	1	1	3	3	1	3	3	3	2	4	5	4	3	5	3	4	3	4	1	3	1
458	5	5	3	4	3	4	5	3	4	4	4	4	4	3	3	4	4	3	4	4	5	3	3	3	2	3	3	3	3	3	3	3	3	3	3	3	3	3	3	3	3	3	3	3	3	3	3	3	3
459	3	3	4	4	2	2	4	1	3	3	2	2	2	1	3	4	3	2	4	2	5	3	2	2	2	2	2	2	2	2	2	2	2	2	2	2	3	3	3	2	3	3	2	2	1	1	3	2	2
460	3	5	4	3	3	2	3	1	3	2	1	2	2	2	1	2	3	1	3	2	3	1	4	2	1	2	1	3	1	2	2	2	2	2	1	2	3	1	1	1	4	4	1	3	2	2	2	2	2
461	3	4	4	4	1	1	4	2	3	3	3	3	1	1	4	5	5	1	5	5	4	4	4	4	4	4	4	4	4	4	1	1	1	1	1	1	5	1	1	4	3	1	4	4	4	1	4	2	4
462	5	5	5	5	1	1	3	1	2	3	3	2	2	2	3	3	3	1	4	2	3	2	1	3	2	2	2	3	2	2	2	2	2	2	1	1	3	3	3	1	3	2	1	1	1	1	3	2	2
463	5	3	4	3	2	1	4	1	3	3	1	1	1	1	1	3	3	1	3	3	3	1	1	1	1	1	1	1	1	1	1	1	1	1	1	1	3	1	1	1	3	1	3	3	3	2	3	3	1
464	5	4	4	4	2	2	5	4	4	2	1	2	2	1	1	4	3	1	4	2	2	2	2	2	3	2	3	2	2	3	2	2	2	2	2	3	3	2	2	2	3	2	2	2	2	2	3	3	3
465	5	4	4	5	4	2	2	2	5	2	5	5	5	1	1	3	1	4	5	3	5	3	5	5	3	5	3	3	3	3	5	5	5	5	3	5	2	5	3	3	5	2	4	4	2	4	3	4	2
466	5	5	4	4	1	1	5	1	4	2	1	2	1	2	1	4	4	1	4	3	2	1	2	2	1	4	2	1	1	2	1	4	4	1	1	4	4	4	4	2	2	5	2	2	4	2	2	4	1
467	5	5	4	5	1	2	5	3	5	5	1	1	1	3	4	5	4	1	5	3	3	4	3	2	1	1	4	1	1	1	1	2	1	2	1	4	4	3	3	3	4	1	1	2	3	3	3	4	1
468	3	2	4	1	4	5	2	4	1	1	5	2	2	3	1	3	1	5	3	5	5	5	3	5	3	5	3	2	3	4	1	5	2	2	4	4	2	4	5	4	2	5	2	4	2	4	1	4	4
469	4	4	5	5	1	2	4	2	3	3	2	1	2	1	1	4	4	1	4	2	2	1	1	1	1	1	1	1	1	1	1	1	1	1	1	1	5	1	1	2	4	1	1	1	1	1	4	2	2
470	5	5	4	4	2	3	3	4	5	2	2	3	3	2	1	4	2	3	4	3	5	3	4	4	2	2	2	2	2	2	2	4	2	2	3	2	2	3	3	3	3	4	4	3	3	4	2	4	4
471	5	5	5	3	1	2	4	1	3	2	1	2	2	4	2	5	5	1	4	2	2	1	1	2	2	2	1	1	1	1	1	1	1	1	1	1	4	2	3	2	4	2	1	3	1	1	3	2	2
472	5	3	4	5	2	1	3	3	2	3	2	4	4	1	2	3	2	1	3	2	5	2	2	4	2	1	1	4	2	2	1	4	2	2	1	4	3	3	4	4	2	3	1	3	2	2	1	3	3
473	4	4	3	4	2	3	3	3	4	3	3	3	3	3	3	4	4	3	3	4	4	3	3	3	3	3	3	3	3	3	3	3	2	2	2	3	3	3	4	2	3	4	3	4	3	3	3	3	3
474	4	3	3	2	2	3	2	4	2	4	5	5	4	2	3	3	1	3	4	5	4	3	2	2	2	4	3	3	3	4	4	4	2	3	3	2	3	3	3	3	4	3	2	2	3	3	3	3	3
475	5	4	4	4	4	3	4	2	4	1	3	3	2	1	1	3	4	3	4	3	4	2	2	2	2	2	3	1	2	3	1	2	1	1	2	3	4	1	1	1	4	3	2	1	3	2	3	2	4
476	3	4	3	5	5	3	4	4	4	3	3	4	3	2	3	4	3	4	3	3	3	3	3	3	3	3	3	3	3	3	3	3	3	3	3	3	3	3	3	3	3	3	3	3	3	3	3	3	3
478	5	5	4	3	2	2	5	4	5	5	3	3	4	3	4	4	4	2	4	5	5	1	3	2	2	3	1	3	1	1	1	3	1	3	1	1	3	3	4	4	4	1	4	3	4	3	2	4	2
479	4	4	5	5	2	3	4	2	1	4	3	3	3	4	3	5	1	2	4	3	5	2	2	3	2	4	3	3	1	2	3	5	2	3	2	3	3	4	3	2	5	1	1	1	2	3	4	2	2
480	4	4	4	3	2	5	4	3	4	4	5	5	4	2	1	3	1	5	4	5	5	5	2	4	5	5	5	1	1	1	4	4	1	3	5	5	3	2	3	1	3	2	5	4	4	2	3	5	4
481	4	5	5	5	1	1	4	2	3	2	1	4	2	2	1	5	2	2	5	2	5	2	2	4	4	3	2	3	3	2	2	4	1	2	2	2	3	2	2	2	3	4	2	3	2	2	3	2	2
482	2	3	4	3	4	4	2	3	3	4	5	4	3	4	2	5	4	3	3	3	5	3	1	3	1	3	3	2	1	4	3	3	2	3	1	3	3	4	4	3	3	3	3	2	3	4	3	3	3
483	5	5	4	3	2	3	4	4	3	5	3	2	2	2	4	3	3	3	4	2	4	3	4	2	1	2	3	4	2	2	3	4	2	3	1	3	3	2	4	4	3	3	3	4	3	2	3	4	2
485	3	5	4	4	2	1	4	1	2	2	1	2	1	2	1	4	5	1	4	4	4	1	1	1	3	2	1	1	1	4	1	1	1	1	3	1	4	3	4	3	3	4	2	3	4	3	2	2	2
486	4	4	4	4	3	3	3	3	3	3	3	3	3	2	2	3	2	4	4	2	3	3	4	4	3	3	3	2	2	2	3	3	2	4	3	3	3	3	4	3	3	4	3	2	3	3	3	3	3
487	4	5	3	2	4	2	5	2	5	2	2	3	3	3	2	2	4	2	2	2	3	2	2	3	3	3	3	2	2	2	2	3	2	2	3	3	3	3	3	2	3	3	2	4	3	3	2	4	3
488	4	2	4	3	4	3	3	4	2	4	4	3	4	3	2	4	3	4	2	4	3	4	2	3	3	2	2	2	2	2	4	4	2	4	3	4	4	3	4	3	3	2	2	4	3	3	3	4	4
489	4	4	3	3	4	2	4	4	3	5	3	2	2	2	3	3	2	2	4	5	4	3	3	5	4	5	3	2	3	2	4	4	3	3	3	3	3	3	4	3	3	4	4	4	4	3	3	4	3
490	5	2	2	1	5	5	2	4	4	2	5	5	5	4	2	4	2	4	2	4	5	5	5	5	2	4	4	4	4	3	4	5	3	3	3	4	2	4	5	2	2	5	4	5	2	3	1	4	3
491	4	4	3	3	2	2	4	1	4	2	4	4	4	2	2	4	4	3	4	3	4	4	4	3	3	3	3	2	1	2	4	4	2	2	3	3	4	3	4	4	3	3	2	3	3	3	2	3	4
492	5	5	4	2	4	1	5	2	3	4	2	1	1	5	4	2	4	2	3	5	5	5	5	5	4	5	3	4	1	5	3	4	4	5	4	2	2	3	4	5	3	5	4	4	3	2	1	5	4
493	4	4	4	2	2	3	3	2	4	4	4	2	2	2	4	3	3	3	3	3	2	2	2	2	2	2	2	1	1	1	1	1	1	3	3	1	2	4	4	1	2	5	2	4	2	3	2	2	3
494	5	5	5	5	1	5	5	5	5	5	5	5	1	1	1	5	5	5	1	1	3	2	1	3	1	2	3	1	1	1	1	1	1	1	1	5	5	3	2	1	3	1	1	1	5	1	2	5	1
495	5	5	3	2	3	2	3	2	4	3	2	4	4	4	2	1	2	2	4	4	5	2	3	5	5	4	2	4	3	5	3	4	4	4	4	3	1	5	4	4	2	4	2	3	4	3	1	4	5
496	4	2	4	4	2	4	4	3	1	3	5	4	4	3	3	4	2	4	3	4	4	4	4	4	4	5	4	2	2	1	1	4	3	4	3	4	4	3	2	1	3	2	1	4	3	2	3	1	2
497	3	5	3	3	2	1	4	2	4	2	2	2	2	2	2	4	3	2	4	2	4	2	2	2	2	2	1	1	1	1	1	1	2	1	1	2	3	4	2	3	3	2	2	1	1	1	2	2	1
498	3	2	3	4	3	2	4	2	2	3	4	4	3	2	3	4	4	2	4	4	4	3	2	2	2	2	4	1	1	2	2	2	2	3	2	3	4	2	3	2	4	2	2	2	2	2	4	4	3
499	5	5	4	5	2	2	5	3	5	5	3	4	1	1	4	4	4	1	5	5	5	2	4	4	4	3	3	4	2	3	4	4	4	4	1	3	1	5	2	2	5	2	3	4	5	2	4	4	1
500	5	5	3	5	1	1	4	1	4	2	1	3	4	1	3	3	4	1	4	2	5	2	1	4	3	2	3	1	1	4	5	5	2	2	2	3	5	3	4	2	3	3	2	4	1	1	2	4	5
501	4	5	4	2	2	4	2	3	4	4	5	3	4	4	3	4	4	4	4	5	5	3	4	3	3	5	3	3	4	4	5	3	2	2	3	3	3	5	4	4	1	3	2	4	2	2	2	5	4
502	2	2	3	4	2	3	2	4	2	3	3	4	4	1	3	4	3	4	4	2	4	4	4	2	2	3	3	2	2	2	2	2	1	2	1	3	4	3	2	2	3	3	2	2	2	3	3	3	3
503	5	5	4	5	1	1	2	4	1	2	5	2	4	2	1	2	5	2	5	5	4	4	3	4	1	3	4	1	1	3	3	4	2	1	2	4	1	5	5	5	4	3	3	2	4	2	1	2	3
504	4	5	4	3	1	2	4	3	3	2	2	4	4	1	1	3	2	2	5	5	2	3	3	5	2	3	1	1	2	2	4	4	2	3	1	2	3	3	3	2	3	1	2	3	3	2	3	4	3
507	2	4	4	4	2	3	3	3	4	3	3	3	3	3	3	4	3	3	3	3	3	3	3	3	3	3	3	3	3	1	3	3	1	3	2	3	3	3	3	2	3	3	2	2	2	2	3	3	3
508	4	4	4	3	3	3	3	4	4	3	3	3	3	2	3	4	4	3	4	4	5	2	4	4	3	3	2	2	2	1	1	3	1	2	3	3	3	3	4	3	3	3	1	4	1	2	2	4	2
509	4	4	4	3	4	1	4	4	5	5	1	5	4	5	4	5	2	4	3	4	4	2	3	3	4	5	5	2	1	3	1	2	3	1	2	1	2	4	5	4	2	1	2	2	4	4	2	4	3
510	5	4	3	5	4	2	2	4	4	2	3	3	4	4	1	4	2	2	5	4	5	4	2	2	2	4	5	2	2	2	2	4	2	2	1	2	3	4	4	2	4	2	3	2	3	4	3	3	3
511	5	5	4	4	4	4	4	4	5	5	3	4	3	3	3	3	3	4	4	4	4	3	3	3	2	2	4	3	3	4	2	2	2	2	3	3	2	4	4	4	3	4	3	2	3	4	2	4	4
512	4	4	4	4	3	5	3	4	2	2	5	4	5	3	1	4	2	5	4	1	5	5	3	4	2	5	4	2	3	2	4	4	2	2	2	4	3	3	2	2	4	3	2	2	4	2	3	3	2
515	4	4	3	3	2	2	4	3	3	3	2	2	4	2	2	3	4	2	4	4	5	3	3	4	4	4	3	1	1	1	5	4	2	3	2	2	3	3	3	3	3	5	2	2	3	1	2	2	3
516	2	2	3	2	4	3	3	4	2	1	4	4	3	3	1	1	1	4	2	2	3	4	2	3	3	4	4	1	1	1	4	3	2	3	3	4	3	4	4	3	2	5	4	4	3	3	2	4	3
517	5	5	4	3	1	2	5	2	5	1	2	2	1	1	2	4	5	2	5	2	5	3	2	2	2	2	2	2	1	2	2	2	2	2	1	2	4	2	2	1	3	2	3	3	4	3	3	4	2
518	5	5	4	3	3	3	4	4	5	3	3	4	4	3	2	3	5	3	3	4	4	4	5	4	3	4	3	1	2	3	4	4	3	4	2	4	3	4	4	3	3	4	3	4	3	3	2	3	3
519	5	4	3	4	2	3	3	5	2	2	5	3	3	2	1	4	1	5	4	3	5	4	4	4	5	3	4	3	4	3	5	5	3	3	2	4	4	2	3	4	3	1	3	5	5	2	4	3	3
520	5	5	5	4	3	3	4	3	3	3	3	2	2	2	3	3	3	3	3	3	4	3	3	3	3	3	3	3	2	2	3	3	2	2	2	3	3	3	3	4	3	3	3	4	2	2	2	3	2
521	5	5	4	4	3	2	4	3	5	4	2	3	3	2	3	4	3	2	4	4	3	2	3	3	3	3	2	1	1	2	1	2	1	2	2	3	3	3	3	2	4	3	2	3	3	2	3	4	2
522	4	4	4	4	4	4	4	4	4	4	4	4	4	4	2	2	1	3	4	2	4	2	2	4	4	4	4	2	2	2	4	4	2	4	3	4	2	4	4	4	3	4	2	4	2	4	2	4	3
523	4	4	3	4	2	4	4	2	4	3	4	4	4	3	2	3	4	4	3	4	4	2	4	4	3	4	3	2	2	4	3	4	3	4	3	3	3	4	3	2	4	2	4	2	2	2	2	2	2
524	5	4	4	5	2	2	4	2	4	4	2	1	4	1	2	4	4	2	4	3	4	2	1	2	1	2	2	2	1	3	4	3	1	3	2	2	4	3	1	1	4	4	1	1	2	1	4	3	2
525	5	5	4	4	2	2	4	4	4	4	2	2	2	2	3	3	4	2	3	3	4	2	1	4	3	2	2	1	1	2	2	4	2	2	3	2	2	3	5	4	3	4	1	1	1	1	3	4	3
526	4	5	5	3	2	3	4	3	3	2	4	3	4	2	2	3	3	4	3	2	5	3	4	4	3	3	4	2	2	2	2	4	3	4	2	3	3	4	3	3	4	2	2	3	4	2	2	4	4
527	4	2	4	4	4	5	3	4	2	3	5	5	4	4	2	3	3	5	3	3	4	2	3	3	3	3	3	3	2	3	2	3	2	3	3	4	3	4	4	3	2	3	2	4	3	3	2	4	3
528	3	3	3	3	2	4	4	4	3	3	4	4	3	3	4	2	2	4	2	2	4	2	2	2	2	3	2	2	2	2	2	2	2	2	2	2	2	2	5	3	2	3	3	4	4	3	2	2	2
529	4	5	4	1	2	4	5	2	5	1	5	4	2	2	1	4	1	5	4	3	5	4	2	4	1	4	3	1	1	1	1	4	2	4	2	5	2	4	4	1	2	5	2	1	1	1	1	4	2
530	5	4	4	3	3	5	3	3	1	4	5	4	4	3	3	3	4	4	3	4	4	1	5	3	3	4	2	2	1	3	4	4	2	4	3	2	3	4	3	3	3	3	3	4	4	4	2	3	2
531	5	5	5	3	2	1	4	1	4	2	2	3	2	2	1	3	3	2	3	2	4	2	3	5	4	4	3	2	2	2	2	4	4	4	4	3	3	3	3	2	3	3	2	3	4	2	2	4	3
532	4	4	4	5	4	2	3	3	2	5	2	2	2	2	3	4	4	2	4	4	5	2	2	4	3	2	4	2	2	1	1	3	2	2	2	2	4	3	4	2	2	1	1	2	2	2	3	3	2
533	2	3	4	4	2	3	3	3	2	3	4	2	2	1	3	4	2	2	4	4	3	2	4	2	1	2	2	2	1	1	1	1	2	2	1	2	3	3	3	3	4	2	2	2	2	2	3	3	2
534	5	4	4	5	4	3	4	3	4	3	3	5	3	3	3	4	5	2	4	3	5	2	3	2	3	2	2	2	3	2	3	2	2	2	3	2	2	3	3	3	3	3	3	3	2	3	2	3	3
535	4	4	3	2	3	4	4	3	3	4	4	5	4	3	2	2	4	3	3	3	5	2	3	4	3	4	3	4	2	2	4	2	2	4	3	3	2	4	5	4	3	4	2	3	4	3	2	5	3
536	5	5	4	5	2	1	5	3	4	4	5	2	4	3	2	4	5	2	4	3	5	2	3	3	3	2	3	1	1	1	4	4	1	1	3	3	3	3	3	1	2	4	3	4	4	2	1	3	4
537	3	3	4	3	2	3	1	3	4	2	3	3	3	2	1	3	4	4	3	2	2	4	3	2	2	3	3	1	1	3	1	2	1	1	1	3	3	3	4	3	3	4	1	3	4	3	3	2	2
538	5	5	4	3	2	1	4	2	5	4	2	4	3	2	2	3	4	2	4	2	5	4	3	5	5	5	3	2	2	2	2	5	2	3	2	3	3	4	4	4	4	4	2	4	2	2	3	3	4
539	5	5	4	5	3	2	4	2	5	4	2	3	2	2	2	4	4	2	4	4	5	2	2	3	4	2	2	4	2	2	2	2	2	3	3	2	2	4	3	3	4	4	3	3	3	2	2	4	4
540	5	5	3	4	1	2	4	4	4	4	4	3	3	2	2	4	4	3	4	4	4	2	2	2	2	2	4	2	1	1	1	1	1	3	2	2	3	3	3	1	2	3	4	2	2	3	2	3	2
541	4	3	4	4	3	2	3	3	3	2	2	4	2	2	2	4	2	2	4	3	4	3	3	2	2	3	3	2	2	1	2	3	2	2	2	3	4	3	3	2	3	2	2	2	2	2	3	2	3
542	4	4	4	4	3	3	4	3	4	4	3	3	3	3	4	4	4	3	4	3	4	3	3	3	3	3	3	3	3	3	3	3	3	3	3	3	3	3	4	3	3	5	4	4	4	4	2	4	4
543	4	4	5	5	3	2	5	2	5	2	1	3	4	2	1	3	4	2	4	4	4	1	1	4	4	4	2	1	4	4	2	2	4	2	4	3	2	4	3	4	4	4	4	4	4	3	4	3	4
544	5	5	4	4	4	3	4	1	4	5	1	2	2	1	4	5	3	2	4	5	3	2	2	4	3	2	2	4	1	3	2	1	3	4	2	3	4	3	3	3	4	2	3	2	3	2	2	4	2
545	4	3	3	2	2	2	3	2	5	3	4	4	2	3	2	3	3	4	4	3	5	4	3	5	3	5	5	4	3	4	2	4	3	4	4	4	3	4	3	3	3	5	3	4	3	4	2	3	4
546	5	5	5	5	3	3	3	4	3	3	4	2	3	3	2	4	4	4	3	3	4	3	3	4	2	3	3	3	3	3	3	3	2	3	2	3	3	3	3	3	3	3	3	3	3	3	3	3	3
547	4	3	4	3	2	2	3	4	4	3	3	3	2	3	2	3	2	3	3	2	3	2	2	2	1	2	2	1	2	1	1	1	1	2	2	2	2	3	4	3	3	5	4	3	3	3	2	3	3
548	4	4	4	4	4	4	3	2	2	3	2	3	2	2	2	4	4	3	4	4	5	2	2	2	1	1	1	1	1	1	1	1	1	1	1	1	4	3	2	2	4	2	1	2	2	2	4	2	2
549	3	3	3	3	3	3	4	4	4	4	4	4	4	2	2	3	3	3	3	5	5	2	4	4	4	4	2	4	2	2	2	2	2	4	2	2	3	2	3	3	3	5	2	4	4	2	3	3	3
550	5	5	3	3	2	4	4	4	5	3	4	4	2	2	2	3	4	4	4	4	4	4	4	4	4	4	4	4	3	4	4	4	4	3	4	4	3	4	5	3	3	4	3	4	4	4	3	4	4
551	3	4	4	4	3	4	5	5	2	4	4	4	4	2	4	3	2	5	4	4	5	4	5	4	4	4	4	1	1	2	2	4	3	4	2	4	4	3	3	2	3	2	4	4	2	5	4	4	4
552	3	5	3	5	3	2	4	3	5	5	3	3	3	4	4	5	4	4	4	2	3	1	3	3	3	4	3	1	2	3	1	2	1	3	2	3	3	3	3	3	2	3	4	2	4	3	1	4	4
553	4	3	3	2	2	1	4	3	5	3	1	4	4	2	2	3	3	1	2	3	4	3	3	4	3	2	4	3	4	3	4	4	4	3	3	3	2	4	3	3	3	4	3	2	4	3	2	4	3
554	4	4	4	4	3	3	4	2	4	2	3	4	3	3	2	4	4	3	4	4	4	2	3	4	3	4	4	3	3	3	2	4	4	4	3	3	3	4	3	3	3	3	2	3	2	2	3	4	3
555	5	5	3	4	1	4	5	2	3	1	3	5	3	1	1	4	2	3	5	5	5	5	5	5	5	5	3	2	5	5	2	5	3	5	5	5	3	3	3	4	3	2	3	4	3	4	3	5	3
556	4	4	3	4	2	2	4	1	4	3	2	2	2	2	1	4	4	2	3	2	2	3	3	3	2	3	3	2	1	3	1	3	3	2	2	3	3	3	4	2	2	4	2	2	3	2	3	3	4
557	3	4	2	4	2	4	4	3	4	5	2	2	4	2	1	2	4	2	2	2	5	4	4	5	5	5	4	3	2	1	5	4	5	4	4	4	2	4	5	4	4	4	2	4	4	4	2	4	3
558	4	5	3	2	2	2	4	4	2	3	2	4	4	4	2	3	4	2	4	2	4	2	4	4	4	4	4	4	2	4	4	4	2	4	4	2	2	4	4	2	2	5	5	3	2	4	2	4	4
559	4	5	4	2	1	1	5	1	4	4	1	3	4	1	1	3	4	1	4	2	5	2	4	2	5	2	5	2	1	4	2	2	2	2	5	4	2	5	5	2	3	5	2	3	3	2	2	2	4
560	5	5	5	4	2	5	5	5	5	5	5	3	4	4	1	4	3	5	4	3	5	1	5	3	1	1	1	5	1	1	1	2	1	4	1	1	3	4	2	2	3	1	1	5	5	3	3	4	4
561	4	3	3	2	2	2	2	3	3	4	2	4	3	2	3	3	3	2	3	2	2	1	2	3	3	3	3	3	3	3	3	3	3	2	3	3	3	3	3	3	3	3	2	4	2	3	2	4	3
562	3	4	3	3	4	4	4	5	4	2	4	4	3	2	1	4	4	4	2	4	4	4	2	2	2	2	4	2	2	4	1	2	3	3	2	4	3	4	3	2	2	3	2	2	2	2	3	4	4
563	3	3	3	4	3	4	2	4	3	3	4	4	4	3	2	3	4	4	3	3	4	3	3	4	3	4	4	3	2	3	3	4	4	4	3	4	2	4	4	4	3	4	4	4	3	4	2	4	3
564	5	3	4	3	3	4	4	4	4	3	5	4	2	2	1	5	4	5	5	5	5	4	3	5	3	5	4	2	2	2	3	4	2	3	2	5	4	3	4	4	4	5	3	3	3	3	2	3	1
565	4	4	4	4	1	1	4	1	3	1	1	1	3	1	1	4	3	2	4	1	1	1	4	2	2	2	2	2	2	2	2	2	1	2	1	2	4	2	1	2	3	2	2	2	2	2	4	2	1
566	3	5	3	3	2	3	3	3	4	4	3	3	3	3	3	3	4	3	4	3	5	4	5	5	5	4	3	4	4	1	4	4	4	5	5	3	2	5	5	5	3	5	4	4	5	3	3	4	4
567	4	5	4	4	2	4	4	2	4	2	2	2	4	2	3	4	3	3	4	4	4	2	4	4	3	3	3	3	2	2	2	2	2	4	2	3	3	2	2	2	3	2	4	3	3	3	2	4	3
568	5	5	4	4	4	2	5	3	5	4	4	4	4	4	3	4	4	4	4	4	4	3	3	4	3	4	4	4	3	4	4	4	4	4	4	4	4	4	3	5	5	4	3	3	3	4	3	4	4
569	5	4	3	5	1	2	2	4	2	2	4	2	3	1	3	3	5	1	5	4	4	1	3	3	4	1	3	1	3	3	3	3	3	3	2	2	2	2	4	3	5	4	2	4	4	2	2	4	4
570	5	5	4	2	3	1	5	3	4	5	2	4	2	3	4	3	3	2	4	4	4	2	3	3	2	2	3	2	2	3	2	2	2	3	3	3	3	4	3	3	2	3	3	3	3	3	2	4	4
571	4	4	4	3	3	3	4	2	4	3	2	3	3	2	2	4	4	4	3	4	4	4	4	3	4	3	3	3	2	1	1	1	1	3	3	2	3	3	3	2	2	5	2	3	2	2	2	4	3
572	4	3	4	3	3	4	2	4	2	4	5	3	4	2	3	5	3	4	5	3	3	2	2	3	2	3	3	2	2	4	2	3	2	4	2	3	3	4	3	3	3	3	3	5	2	4	3	4	3
573	4	4	4	3	2	2	4	1	4	2	1	2	3	1	1	4	3	2	4	3	4	3	2	2	2	1	3	3	2	2	2	2	2	1	2	3	4	3	3	2	4	3	2	2	2	2	4	4	3
574	4	2	3	4	1	3	2	3	2	3	3	4	4	4	2	4	3	3	4	2	2	4	2	3	2	2	4	2	2	2	3	2	3	2	2	3	3	4	4	2	3	3	2	3	2	2	2	2	2
575	4	5	4	4	2	2	5	1	5	4	2	3	3	2	2	4	3	2	4	3	4	2	1	2	1	1	2	3	3	2	2	3	3	1	1	1	4	2	1	1	4	3	1	2	4	3	3	2	2
576	4	4	3	4	3	4	2	2	4	4	3	4	3	2	2	3	3	3	4	3	4	4	2	2	3	2	2	2	2	2	1	1	2	2	2	2	3	3	4	3	2	3	2	3	2	1	1	3	2
577	4	4	3	3	2	2	4	2	5	4	3	4	4	2	2	3	3	3	4	2	4	1	4	3	2	3	2	1	1	3	3	2	1	3	1	3	3	3	3	1	3	4	2	3	2	2	2	4	3
578	5	4	2	4	3	1	4	2	2	3	1	3	2	3	2	4	3	2	4	3	5	2	2	1	2	1	2	2	1	3	2	2	2	3	2	2	3	4	4	2	3	3	2	3	2	3	1	4	3
579	3	4	5	5	1	2	3	2	1	2	4	2	4	1	3	4	4	3	5	3	4	1	1	2	2	2	2	1	1	1	2	1	1	1	1	1	3	3	3	2	3	1	3	2	2	2	2	4	3
580	5	5	4	3	1	3	5	1	5	4	2	3	4	2	4	3	4	3	5	3	4	1	3	3	3	3	3	3	3	3	3	3	3	3	3	2	3	2	3	3	3	4	3	3	3	3	3	3	3
581	4	5	3	2	2	3	4	3	4	1	1	4	5	1	1	3	2	4	4	4	5	3	4	5	1	3	2	1	1	2	4	4	4	3	2	3	2	4	5	1	3	3	1	4	3	2	1	5	5
582	4	4	5	5	2	4	4	2	4	4	1	2	3	1	3	4	4	1	4	4	4	1	1	4	2	2	1	3	1	2	3	4	2	2	2	3	4	3	3	4	3	4	4	2	2	3	3	4	5
[truncated: 24 more columns]

## Sheet: Data description
ZTPI				Self-control scale
Factors	Items			Factors	Items
Past positive	a2,a7,a9,a17			Impulse Control	b7，b9，b10，b16，b17，b18
Past negative	a6,a8,a11,a18			Achievement and Task Performance	b12，b13，b14
Present hedonistic	a1,a10,a15,a20			Healthy Habits	b2，b3，b6
Present fatalistic	a5,a12,a13,a14			Abstinent Entertainment	b4，b8，b19
Future	a3,a4,a16,a19			Resisting Temptation	b1，b5，b11，b15
Mobile phone addiction tendency scale
Factors	Items
Withdrawal Symptoms	c1,c4,c6,c8,c10,c12
Salience	c5,c9,c13,c15
Psychological Comfort	c2,c7,c16
Mood Changes	c3,c11,c13
gender: 1=male;2=female
grade: 1=freshmen;2=sophomores;3=juniors;4=seniors
